# Supplementary material for: gPKPDviz: A flexible R shiny tool for pharmacokinetic/pharmacodynamic simulations using mrgsolve
Source: PubMed Central journal article supplement — CPT Pharmacometrics Syst Pharmacol. 2023 Dec 26;13(3):341–58. doi: 10.1002/psp4.13096 (PMC10941578; doi:10.1002/psp4.13096), 2023-12-26
Supplement: PSP4-13-341-s001.pdf [file PSP4-13-341-s001.pdf]

# PKPD Shiny App Validation

Victor Poon

2023-06-02

## Contents

|          |                                                          |           |
|----------|----------------------------------------------------------|-----------|
| <b>1</b> | <b>Overview</b>                                          | <b>2</b>  |
| <b>2</b> | <b>Read in Data and Model</b>                            | <b>2</b>  |
| 2.1      | Mrgsolve Models and Dose Data . . . . .                  | 2         |
| 2.2      | Read in Seed . . . . .                                   | 3         |
| 2.3      | Case 1 Data . . . . .                                    | 3         |
| 2.3.1    | Covariate . . . . .                                      | 3         |
| 2.3.2    | Simulation Data from App . . . . .                       | 5         |
| 2.4      | Case 2 Data . . . . .                                    | 5         |
| 2.4.1    | Covariate . . . . .                                      | 5         |
| 2.4.2    | Simulation Data from App . . . . .                       | 6         |
| 2.5      | Case 3 Data . . . . .                                    | 7         |
| 2.5.1    | Covariate . . . . .                                      | 7         |
| 2.5.2    | Simulation Data from App . . . . .                       | 8         |
| 2.6      | Case 4 Data . . . . .                                    | 9         |
| 2.6.1    | Covariate . . . . .                                      | 9         |
| 2.6.2    | Simulation Data from App . . . . .                       | 11        |
| 2.7      | Case 5 Data . . . . .                                    | 12        |
| 2.7.1    | Individual Parameter, Sampling and Dosing Time . . . . . | 12        |
| 2.7.2    | Simulation Data from App . . . . .                       | 12        |
| 2.8      | App statistics . . . . .                                 | 12        |
| <b>3</b> | <b>Perform Simulations</b>                               | <b>14</b> |
| 3.1      | Case 1 . . . . .                                         | 14        |
| 3.2      | Case 2 . . . . .                                         | 15        |
| 3.3      | Case 3 . . . . .                                         | 15        |
| 3.4      | Case 4 . . . . .                                         | 15        |
| 3.5      | Case 5 . . . . .                                         | 16        |

|                                                           |           |
|-----------------------------------------------------------|-----------|
| <b>4 Plot (Validation vs App)</b>                         | <b>16</b> |
| 4.1 Case 1 . . . . .                                      | 17        |
| 4.2 Case 2 . . . . .                                      | 17        |
| 4.3 Case 3 . . . . .                                      | 18        |
| 4.4 Case 4 . . . . .                                      | 19        |
| 4.4.1 By ALBU Bin . . . . .                               | 20        |
| 4.5 Case 5 . . . . .                                      | 21        |
| <b>5 Summary Stats</b>                                    | <b>22</b> |
| 5.1 Function . . . . .                                    | 22        |
| 5.2 Case 1 . . . . .                                      | 23        |
| 5.2.1 Validation . . . . .                                | 23        |
| 5.2.2 Calculate % Difference . . . . .                    | 23        |
| 5.3 Case 2 . . . . .                                      | 26        |
| 5.3.1 Validation data summary stats calculation . . . . . | 26        |
| 5.3.2 Calculate Difference . . . . .                      | 26        |
| 5.4 Case 3 . . . . .                                      | 28        |
| 5.4.1 Validation data summary stats calculation . . . . . | 28        |
| 5.4.2 Calculate Difference . . . . .                      | 28        |
| 5.5 Case 4 . . . . .                                      | 31        |
| 5.5.1 Validation data summary stats calculation . . . . . | 31        |
| 5.5.2 Calculate Difference . . . . .                      | 31        |

## 1 Overview

The key simulations performed in the app for validation purpose include the following: Case 1: population simulation based on the simulated covariates (1000 virtual individuals), the simulated dosing regimen and the user-defined sampling times; set seed to for randomization control; Case 2: population simulation based on the actual covariates (sampling with replacement from the 477 individuals to generate 1000 individuals), the simulated dosing regimen and the user-defined sampling time; set seed to for randomization control; Case 3: case 2 with simulation of typical profile (PRED); Case 4: case 2 filtered by cycle 8 and stratified by ALBUbin; Case 5: individual simulation of the actual patients (n = 477) based on the post-hoc parameters, the individual dosing history and individual sampling time augmented with the fine time grid.

## 2 Read in Data and Model

### 2.1 Mrgsolve Models and Dose Data

```
mod.pop <- mread(model="Pop",
                 file="../PKcase_Perjeta_valid.cpp")
```

```
## Building Pop ... done.
```

```
mod.indiv <- mread(model="Indiv",  
                  file="../mrgsolve_ind/Perjeta.ind.cov.cpp")
```

```
## Building Indiv ... done.
```

```
base.dose<-read_csv("Base.csv") %>%  
  mutate(time=ifelse(time==0,1.00e-10,time))
```

```
## Rows: 8 Columns: 5  
## -- Column specification -----  
## Delimiter: ","  
## dbl (5): amt, evid, cmt, time, rate  
##  
## i Use 'spec()' to retrieve the full column specification for this data.  
## i Specify the column types or set 'show_col_types = FALSE' to quiet this message.
```

## 2.2 Read in Seed

```
my.seed<-read_csv("AppData/Case 1/randomSeed.csv")$`Random Seed`
```

```
## Rows: 1 Columns: 1  
## -- Column specification -----  
## Delimiter: ","  
## dbl (1): Random Seed  
##  
## i Use 'spec()' to retrieve the full column specification for this data.  
## i Specify the column types or set 'show_col_types = FALSE' to quiet this message.
```

## 2.3 Case 1 Data

### 2.3.1 Covariate

```
case1.covar.app<-read_csv("AppData/Case 1/SimulatedData.csv") %>%  
  select(ID,ALBU,LBW) %>%  
  distinct()
```

```
## Warning: One or more parsing issues, see 'problems()' for details  
  
## Rows: 194000 Columns: 19  
## -- Column specification -----  
## Delimiter: ","  
## chr (3): SIM_TYPE, REC_TYPE, SIM_ID  
## dbl (15): USUBJID, ID, time, EVID, AMT, period, ALBU, LBW, CENT, PERIPH, IPR...  
## lgl (1): covar_propo  
##  
## i Use 'spec()' to retrieve the full column specification for this data.  
## i Specify the column types or set 'show_col_types = FALSE' to quiet this message.
```

```

# Script generated results matches exactly with app covariate distribution
set.seed(my.seed)
case1.covar<-rmvtnorm::rtmvnorm(
  n = 1000,
  mean = c(3.9,51.3),
  sigma = diag(c(.5^2,9.5^2)),
  lower = c(2.1,31),
  upper =c(5.3,82)
) %>%
as_tibble() %>%
rename(ALBU=V1,LBW=V2)

```

```

## Warning: The 'x' argument of 'as_tibble.matrix()' must have unique column names if
## '.name_repair' is omitted as of tibble 2.0.0.
## i Using compatibility '.name_repair'.
## This warning is displayed once every 8 hours.
## Call 'lifecycle::last_lifecycle_warnings()' to see where this warning was
## generated.

```

### 2.3.1.1 Check Matching of Covariate Distributions

```
summary(case1.covar.app[-1])
```

#### 2.3.1.1.1 App

```

##           ALBU           LBW
## Min.      :2.490   Min.      :31.12
## 1st Qu.:3.582   1st Qu.:46.07
## Median :3.910   Median :52.22
## Mean     :3.902   Mean     :52.38
## 3rd Qu.:4.252   3rd Qu.:58.47
## Max.     :5.257   Max.     :81.85

```

```
summary(case1.covar)
```

#### 2.3.1.1.2 Validation

```

##           ALBU           LBW
## Min.      :2.490   Min.      :31.12
## 1st Qu.:3.582   1st Qu.:46.07
## Median :3.910   Median :52.22
## Mean     :3.902   Mean     :52.38
## 3rd Qu.:4.252   3rd Qu.:58.47
## Max.     :5.257   Max.     :81.85

```

## 2.3.2 Simulation Data from App

```
# Case 1 App Simulations
case1_simdata.app<-read_csv("AppData/Case 1/simulatedData.csv") %>%
  mutate(time=round(time,5))

## Warning: One or more parsing issues, see 'problems()' for details

## Rows: 194000 Columns: 19
## -- Column specification -----
## Delimiter: ","
## chr (3): SIM_TYPE, REC_TYPE, SIM_ID
## dbl (15): USUBJID, ID, time, EVID, AMT, period, ALBU, LBW, CENT, PERIPH, IPR...
## lgl (1): covar_propo
##
## i Use 'spec()' to retrieve the full column specification for this data.
## i Specify the column types or set 'show_col_types = FALSE' to quiet this message.
```

```
case1_obdata<-case1_simdata.app %>%
  filter(REC_TYPE=="Observation") %>%
  select(time) %>%
  distinct() %>%
  filter(!time %in% seq(0,175,by=1))

# Extra Dosing Data on top of daily sampling
case1_addtime<-case1_obdata$time
```

## 2.4 Case 2 Data

### 2.4.1 Covariate

```
actual.population<-read_csv("../mrgsolve_ind/population.data.indpara.csv") %>%
  rename(ID=USUBJID) %>%
  select(-time)

## Rows: 477 Columns: 8
## -- Column specification -----
## Delimiter: ","
## dbl (8): USUBJID, time, CLind, Vlind, Qind, V2ind, ALBU, LBW
##
## i Use 'spec()' to retrieve the full column specification for this data.
## i Specify the column types or set 'show_col_types = FALSE' to quiet this message.
```

```
case2.covar.app<-read_csv("AppData/Case 2/SimulatedData.csv") %>%
  select(ID,ALBU,LBW) %>%
  distinct()
```

```
## Warning: One or more parsing issues, see 'problems()' for details
```

```
## Rows: 194000 Columns: 21
## -- Column specification -----
## Delimiter: ","
## chr (5): SIM_TYPE, REC_TYPE, SIM_ID, ALBU (Bins), LBW (Bins)
## dbl (15): USUBJID, ID, time, EVID, AMT, period, ALBU, LBW, CENT, PERIPH, IPR...
## lgl (1): covar_propo
##
## i Use 'spec()' to retrieve the full column specification for this data.
## i Specify the column types or set 'show_col_types = FALSE' to quiet this message.
```

```
# Matches exactly
set.seed(my.seed)
case2.covar.R<-actual.population %>%
  sample_n(size=1000,replace=T) %>%
  mutate(ID=cur_group_rows())
#
```

### 2.4.1.1 Check Matching of Covariate Distributions

```
summary(case2.covar.app[-1])
```

#### 2.4.1.1.1 App

```
##           ALBU           LBW
## Min.      :2.10    Min.      :33.16
## 1st Qu.   :3.50    1st Qu.   :44.63
## Median    :3.90    Median    :48.77
## Mean      :3.85    Mean      :51.72
## 3rd Qu.   :4.20    3rd Qu.   :58.02
## Max.      :5.30    Max.      :82.25
```

```
summary(case2.covar.R %>% select(ALBU,LBW))
```

#### 2.4.1.1.2 Validation

```
##           ALBU           LBW
## Min.      :2.10    Min.      :33.16
## 1st Qu.   :3.50    1st Qu.   :44.63
## Median    :3.90    Median    :48.77
## Mean      :3.85    Mean      :51.72
## 3rd Qu.   :4.20    3rd Qu.   :58.02
## Max.      :5.30    Max.      :82.25
```

### 2.4.2 Simulation Data from App

```

# Case 2 App Simulations
case2_simdata.app<-read_csv("AppData/Case 2/simulatedData.csv") %>%
  mutate(time=round(time,5))

## Warning: One or more parsing issues, see 'problems()' for details

## Rows: 194000 Columns: 21
## -- Column specification -----
## Delimiter: ","
## chr (5): SIM_TYPE, REC_TYPE, SIM_ID, ALBU (Bins), LBW (Bins)
## dbl (15): USUBJID, ID, time, EVID, AMT, period, ALBU, LBW, CENT, PERIPH, IPR...
## lgl (1): covar_propo
##
## i Use 'spec()' to retrieve the full column specification for this data.
## i Specify the column types or set 'show_col_types = FALSE' to quiet this message.

```

```

case2_obdata<-case2_simdata.app %>%
  filter(REC_TYPE=="Observation") %>%
  select(time) %>%
  distinct() %>%
  filter(!time %in% seq(0,175,by=1))

```

```

# Extra Dose Data
case2_addtime<-case2_obdata$time
case2_dosedata<-case2_simdata.app %>%
  filter(REC_TYPE=="Dose")

```

## 2.5 Case 3 Data

### 2.5.1 Covariate

```

actual.population<-read_csv("../mrgsolve_ind/population.data.indpara.csv") %>%
  rename(ID=USUBJID) %>%
  select(-time)

## Rows: 477 Columns: 8
## -- Column specification -----
## Delimiter: ","
## dbl (8): USUBJID, time, CLind, V1ind, Qind, V2ind, ALBU, LBW
##
## i Use 'spec()' to retrieve the full column specification for this data.
## i Specify the column types or set 'show_col_types = FALSE' to quiet this message.

```

```

case3.covar.app<-read_csv("AppData/Case 3/SimulatedData.csv") %>%
  select(ID,ALBU,LBW) %>%
  distinct()

```

```

## Warning: One or more parsing issues, see 'problems()' for details

```

```
## Rows: 194000 Columns: 21
## -- Column specification -----
## Delimiter: ","
## chr (5): SIM_TYPE, REC_TYPE, SIM_ID, ALBU (Bins), LBW (Bins)
## dbl (15): USUBJID, ID, time, EVID, AMT, period, ALBU, LBW, CENT, PERIPH, IPR...
## lgl (1): covar_propo
##
## i Use 'spec()' to retrieve the full column specification for this data.
## i Specify the column types or set 'show_col_types = FALSE' to quiet this message.
```

```
# Matches exactly
set.seed(my.seed)
case3.covar.R<-actual.population %>%
  sample_n(size=1000,replace=T) %>%
  mutate(ID=cur_group_rows())
```

### 2.5.1.1 Check Matching of Covariate Distributions

```
summary(case3.covar.app[-1])
```

#### 2.5.1.1.1 App

```
##           ALBU           LBW
## Min.      :2.10   Min.      :33.16
## 1st Qu.:3.50   1st Qu.:44.63
## Median :3.90   Median :48.77
## Mean     :3.85   Mean     :51.72
## 3rd Qu.:4.20   3rd Qu.:58.02
## Max.     :5.30   Max.     :82.25
```

```
summary(case3.covar.R %>% select(ALBU,LBW))
```

#### 2.5.1.1.2 Validation

```
##           ALBU           LBW
## Min.      :2.10   Min.      :33.16
## 1st Qu.:3.50   1st Qu.:44.63
## Median :3.90   Median :48.77
## Mean     :3.85   Mean     :51.72
## 3rd Qu.:4.20   3rd Qu.:58.02
## Max.     :5.30   Max.     :82.25
```

### 2.5.2 Simulation Data from App



```

# Case 3 App Simulations
case3_simdata.app<-read_csv("AppData/Case 3/simulatedData.csv") %>%
  mutate(time=round(time,5))

## Warning: One or more parsing issues, see 'problems()' for details

## Rows: 194000 Columns: 21
## -- Column specification -----
## Delimiter: ","
## chr (5): SIM_TYPE, REC_TYPE, SIM_ID, ALBU (Bins), LBW (Bins)
## dbl (15): USUBJID, ID, time, EVID, AMT, period, ALBU, LBW, CENT, PERIPH, IPR...
## lgl (1): covar_propo
##
## i Use 'spec()' to retrieve the full column specification for this data.
## i Specify the column types or set 'show_col_types = FALSE' to quiet this message.

```

```

case3_obdata<-case3_simdata.app %>%
  filter(REC_TYPE=="Observation") %>%
  select(time) %>%
  distinct() %>%
  filter(!time %in% seq(0,175,by=1))

```

```

# Extra Dose Data
case3_addtime<-case3_obdata$time
case3_dosedata<-case3_simdata.app %>%
  filter(REC_TYPE=="Dose")

```

## 2.6 Case 4 Data

### 2.6.1 Covariate

```

actual.population<-read_csv("../mrgsolve_ind/population.data.indpara.csv") %>%
  rename(ID=USUBJID) %>%
  select(-time)

## Rows: 477 Columns: 8
## -- Column specification -----
## Delimiter: ","
## dbl (8): USUBJID, time, CLind, V1ind, Qind, V2ind, ALBU, LBW
##
## i Use 'spec()' to retrieve the full column specification for this data.
## i Specify the column types or set 'show_col_types = FALSE' to quiet this message.

```

```

case4.covar.app<-read_csv("AppData/Case 4/SimulatedData.csv") %>%
  select(ID,ALBU,LBW,`ALBU (Bins)`) %>%
  distinct()

```

```

## Warning: One or more parsing issues, see 'problems()' for details

```

```
## Rows: 194000 Columns: 21
## -- Column specification -----
## Delimiter: ", "
## chr (5): SIM_TYPE, REC_TYPE, SIM_ID, ALBU (Bins), LBW (Bins)
## dbl (15): USUBJID, ID, time, EVID, AMT, period, ALBU, LBW, CENT, PERIPH, IPR...
## lgl (1): covar_propo
##
## i Use 'spec()' to retrieve the full column specification for this data.
## i Specify the column types or set 'show_col_types = FALSE' to quiet this message.
```

```
# Matches exactly
set.seed(my.seed)
case4.covar.R<-actual.population %>%
  sample_n(size=1000,replace=T) %>%
  mutate(ID=cur_group_rows()) %>%
  mutate(ALBIN=as.factor(cut(ALBU,
                             breaks=c(2.1,3.5,3.9,4.2,5.3),
                             include.lowest=TRUE))) %>%
  mutate(ALBIN=as.numeric(ALBIN))
summary(case4.covar.R$ALBIN)
```

```
##      Min. 1st Qu.  Median    Mean 3rd Qu.    Max.
##      1.000  1.000   2.000   2.421  3.000   4.000
```

```
# Bins app:
# "(2.1,3.5]" "(3.5,3.9]" "(3.9,4.2]" "(4.2,5.3]"
```

### 2.6.1.1 Check Matching of Covariate Distributions

```
summary(case4.covar.app[-1])
```

#### 2.6.1.1.1 App

```
##      ALBU      LBW      ALBU (Bins)
## Min.   :2.10  Min.   :33.16  Length:1000
## 1st Qu.:3.50  1st Qu.:44.63  Class :character
## Median :3.90  Median :48.77  Mode  :character
## Mean   :3.85  Mean   :51.72
## 3rd Qu.:4.20  3rd Qu.:58.02
## Max.   :5.30  Max.   :82.25
```

```
table(case4.covar.app$`ALBU (Bins)`)
```

```
##
## (3.5,3.9] (3.9,4.2] (4.2,5.3] [2.1,3.5]
##      291      235      220      254
```

```
summary(case4.covar.R %>% select(ALBU,LBW))
```

### 2.6.1.1.2 Validation

```
##           ALBU           LBW
## Min.      :2.10    Min.    :33.16
## 1st Qu.:3.50    1st Qu.:44.63
## Median :3.90    Median :48.77
## Mean     :3.85    Mean    :51.72
## 3rd Qu.:4.20    3rd Qu.:58.02
## Max.     :5.30    Max.    :82.25
```

```
table(case4.covar.R$ALBIN)
```

```
##
##  1  2  3  4
## 254 291 235 220
```

## 2.6.2 Simulation Data from App

```
# Case 4 App Simulations
case4_simdata.app<-read_csv("AppData/Case 4/simulatedData.csv") %>%
  mutate(time=round(time,5))
```

```
## Warning: One or more parsing issues, see 'problems()' for details

## Rows: 194000 Columns: 21
## -- Column specification -----
## Delimiter: ", "
## chr (5): SIM_TYPE, REC_TYPE, SIM_ID, ALBU (Bins), LBW (Bins)
## dbl (15): USUBJID, ID, time, EVID, AMT, period, ALBU, LBW, CENT, PERIPH, IPR...
## lgl (1): covar_propo
##
## i Use 'spec()' to retrieve the full column specification for this data.
## i Specify the column types or set 'show_col_types = FALSE' to quiet this message.
```

```
case4_obdata<-case4_simdata.app %>%
  filter(REC_TYPE=="Observation") %>%
  select(time) %>%
  distinct() %>%
  filter(!time %in% seq(0,175,by=1))
```

```
# Extra Dose Data
case4_addtime<-case4_obdata$time
case4_dosedata<-case4_simdata.app %>%
  filter(REC_TYPE=="Dose")
```

## 2.7 Case 5 Data

### 2.7.1 Individual Parameter, Sampling and Dosing Time

```
ind.covar<-read_csv("../mrgsolve_ind/population.data.indpara.csv") %>%
  rename(ID=USUBJID) %>%
  select(-time)

## Rows: 477 Columns: 8
## -- Column specification -----
## Delimiter: ","
## dbl (8): USUBJID, time, CLind, V1ind, Qind, V2ind, ALBU, LBW
##
## i Use 'spec()' to retrieve the full column specification for this data.
## i Specify the column types or set 'show_col_types = FALSE' to quiet this message.
```

### 2.7.2 Simulation Data from App

```
# For Mrgsolve
case5_simdata<-read_csv("AppData/Case 5/simulatedData.csv")

## Rows: 68172 Columns: 21
## -- Column specification -----
## Delimiter: ","
## chr (4): SIM_TYPE, REC_TYPE, SIM_ID, covar_propo
## dbl (17): USUBJID, ID, time, EVID, AMT, period, CLind, Qind, V1ind, V2ind, C...
##
## i Use 'spec()' to retrieve the full column specification for this data.
## i Specify the column types or set 'show_col_types = FALSE' to quiet this message.
```

```
# Case 5 App Simulations
case5_simdata.app<-read_csv("AppData/Case 5/simulatedData.csv") %>%
  mutate(time=round(time,5))

## Rows: 68172 Columns: 21
## -- Column specification -----
## Delimiter: ","
## chr (4): SIM_TYPE, REC_TYPE, SIM_ID, covar_propo
## dbl (17): USUBJID, ID, time, EVID, AMT, period, CLind, Qind, V1ind, V2ind, C...
##
## i Use 'spec()' to retrieve the full column specification for this data.
## i Specify the column types or set 'show_col_types = FALSE' to quiet this message.
```

## 2.8 App statistics

```
col_split<-function(dset, prefix, slice=1){
  out<-str_split_fixed(dset, "<br>", 8) %>%
```

```

as_tibble() %>%
mutate(Mean=str_split(V1, ":",simplify = T)[,2],
       SD=str_split(V2, ":",simplify = T)[,2],
       p50=str_split(V3, ":",simplify = T)[,2],
       CV=str_split(V4, ":",simplify = T)[,2],
       p5=str_split(V5, ":",simplify = T)[,2],
       p95=str_split(V6, ":",simplify = T)[,2],
       GM=str_split(V7, ":",simplify = T)[,2],
       GCV=str_split(V8, ":",simplify = T)[,2]) %>%
select(c(9:16)) %>%
mutate(across(.fns=as.numeric)) %>%
rename_with(~ paste0(prefix,"_", .))

if(slice==1) {out %>% slice(-1)
} else out
}

sep_app_data<-function(path,type=1){
app.stats<-read_csv(path)

if(type==1){
AUC<-col_split(app.stats$`AUC Stats`,`AUC`)
CMIN<-col_split(app.stats$`LAST Stats`,`LAST`)
CLAST<-col_split(app.stats$`MAX Stats`,`MAX`)
THRES.app<-app.stats$`Percent Above LAST Threshold (20)`[-1]
} else {
AUC<-col_split(app.stats$`AUC Stats`,`AUC`,0)
CMIN<-col_split(app.stats$`LAST Stats`,`LAST`,0)
CLAST<-col_split(app.stats$`MAX Stats`,`MAX`,0)
THRES.app<-app.stats$`Percent Above LAST Threshold (20)`
}

out<-AUC %>%
  bind_cols(CMIN) %>%
  bind_cols(CLAST) %>%
  mutate(THRES=THRES.app)

if(type==1){
out %>% mutate(Cycle=1:8)%>%
  mutate(THRES=as.numeric(substr(THRES,1,4)))
} else {
out %>% mutate(ALBIN=1:4)
}
}

case1.app.stats<-sep_app_data("AppData/Case 1/summaryStatsAveragesTable.csv")

```

```

## Rows: 9 Columns: 5
## -- Column specification -----
## Delimiter: ","
## chr (5): Summarize by, Percent Above LAST Threshold (20), AUC Stats, LAST St...

```

```
##
## i Use 'spec()' to retrieve the full column specification for this data.
## i Specify the column types or set 'show_col_types = FALSE' to quiet this message.
```

```
case2.app.stats<-sep_app_data("AppData/Case 2/summaryStatsAveragesTable.csv")
```

```
## Rows: 9 Columns: 5
## -- Column specification -----
## Delimiter: ","
## chr (5): Summarize by, Percent Above LAST Threshold (20), AUC Stats, LAST St...
##
## i Use 'spec()' to retrieve the full column specification for this data.
## i Specify the column types or set 'show_col_types = FALSE' to quiet this message.
```

```
case3.app.stats<-sep_app_data("AppData/Case 3/summaryStatsAveragesTable.csv")
```

```
## Rows: 9 Columns: 5
## -- Column specification -----
## Delimiter: ","
## chr (5): Summarize by, Percent Above LAST Threshold (20), AUC Stats, LAST St...
##
## i Use 'spec()' to retrieve the full column specification for this data.
## i Specify the column types or set 'show_col_types = FALSE' to quiet this message.
```

```
## Warning in mask$eval_all_mutate(quo): NAs introduced by coercion
```

```
case4.app.stats<-sep_app_data("AppData/Case 4/summaryStatsAveragesTable.csv",
                              type=2) %>%
  mutate(THRES=as.numeric(str_replace(THRES,"%","")))
```

```
## Rows: 4 Columns: 5
## -- Column specification -----
## Delimiter: ","
## chr (5): Summarize by, Percent Above LAST Threshold (20), AUC Stats, LAST St...
##
## i Use 'spec()' to retrieve the full column specification for this data.
## i Specify the column types or set 'show_col_types = FALSE' to quiet this message.
```

### 3 Perform Simulations

#### 3.1 Case 1

```
dose.dat<- base.dose %>% as.ev()

set.seed(my.seed)
case1.sim.dat<-mod.pop %>%
  idata_set(case1.covar) %>%
  carry_out(evid) %>%
```

```

mrgsim(events=dose.dat,end=168,add=case1_addtime) %>%
as_tibble() %>%
filter(evid==0) %>%
mutate(
  Cycle=ceil(time/21)
) %>%
filter(time!=0)

```

### 3.2 Case 2

```

dose.dat<- base.dose %>% as.ev()

set.seed(my.seed)
case2.sim.dat<-mod.pop %>%
  # zero_re() %>%
  idata_set(case2.covar.R) %>%
  mrgsim(events=dose.dat,start=1,end=175,add=case2_addtime) %>%
  as_tibble() %>%
  distinct() %>%
  mutate(
    Cycle=ceil(time/21)
  )

```

### 3.3 Case 3

```

dose.dat<- base.dose %>% as.ev()

set.seed(my.seed)
case3.sim.dat<-mod.pop %>%
  zero_re() %>%
  idata_set(case3.covar.R) %>%
  mrgsim(events=dose.dat,start=1,end=175,add=case3_addtime) %>%
  as_tibble() %>%
  distinct() %>%
  mutate(
    Cycle=ceil(time/21)
  )

```

### 3.4 Case 4

```

dose.dat<- base.dose %>% as.ev()

set.seed(my.seed)
case4.sim.dat<-mod.pop %>%
  # zero_re() %>%
  idata_set(case4.covar.R) %>%
  carry_out(ALBU,ALBIN) %>%

```

```

mrgsim(events=dose.dat,start=1,end=175,add=case4_addtime) %>%
as_tibble() %>%
distinct() %>%
mutate(
  Cycle=ceil(time/21)
)

```

### 3.5 Case 5

```

case5.sim.input<-case5_simdata %>%
  select(ID,time,EVID,AMT,CLind,Qind,V1ind,V2ind) %>%
  mutate(cmt=1) %>%
  rename(evid=EVID,amt=AMT)

set.seed(my.seed)
case5.sim.dat<-mod.indiv %>%
  data_set(case5.sim.input) %>%
  carry_out(evid) %>%
  mrgsim() %>%
  as_tibble() %>%
  distinct() %>%
  mutate(
    Cycle=ceil(time/21)
  )

```

## 4 Plot (Validation vs App)

```

plot.compare<-function(R.dat,app.dat){
  R.plot<-R.dat %>% select(ID,time,IPREDnormal) %>%
  group_by(time) %>%
  dplyr::summarise(
    med=median(IPREDnormal),
    p5=quantile(IPREDnormal,p=0.05),
    p95=quantile(IPREDnormal,p=0.95)) %>%
  mutate(type="Validation")

  App.plot<-app.dat %>%
  filter(REC_TYPE=="Observation",time!=0) %>%
  select(ID,time,IPREDnormal) %>%
  group_by(time) %>%
  dplyr::summarise(
    med=median(IPREDnormal),
    p5=quantile(IPREDnormal,p=0.05),
    p95=quantile(IPREDnormal,p=0.95)) %>%
  mutate(type="App")

  summary_dat<-R.plot %>%
  rbind(App.plot)

  ggplot(summary_dat,aes(time))+
  geom_ribbon(aes(ymin=p5,ymax=p95),fill="grey")+

```



```
geom_line(aes(y=med)) +  
facet_wrap("type")  
}
```

## 4.1 Case 1

```
plot.compare(case1.sim.dat,case1_simdata.app)
```

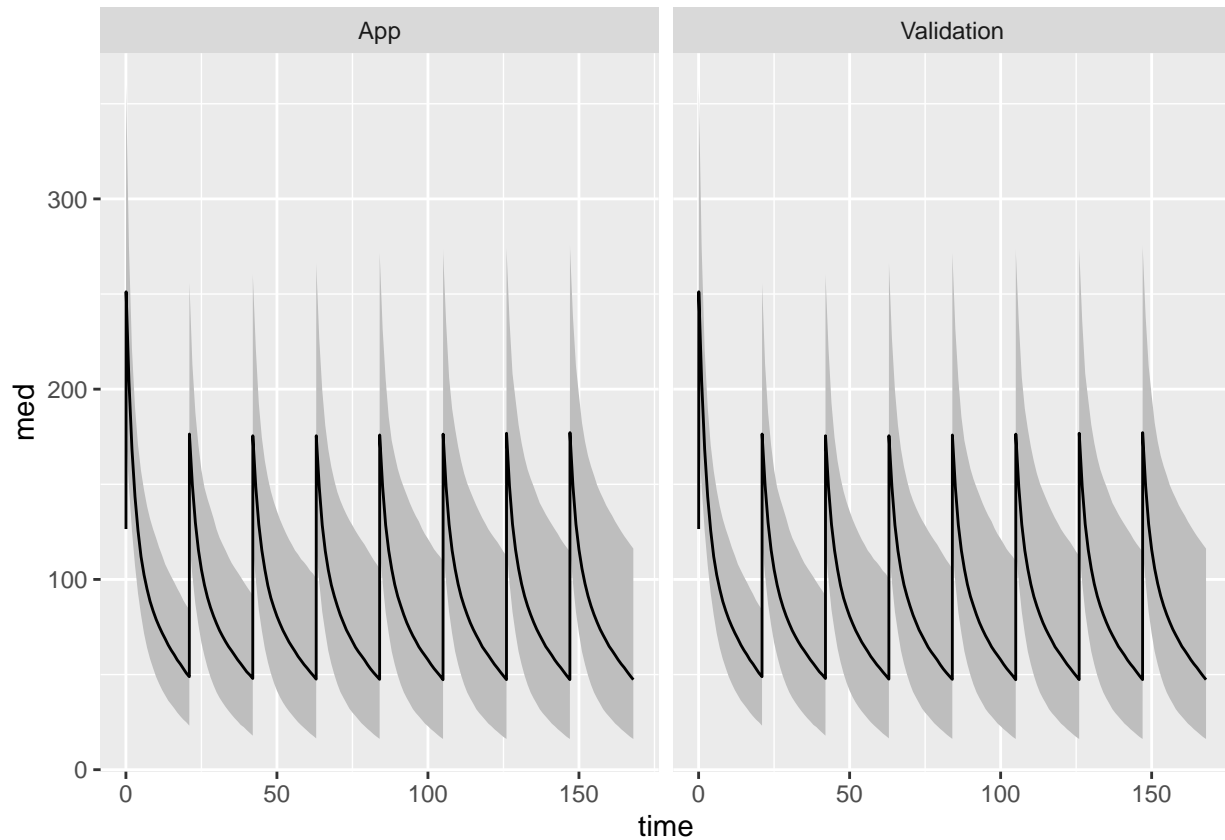

## 4.2 Case 2

```
plot.compare(case2.sim.dat,case2_simdata.app)
```

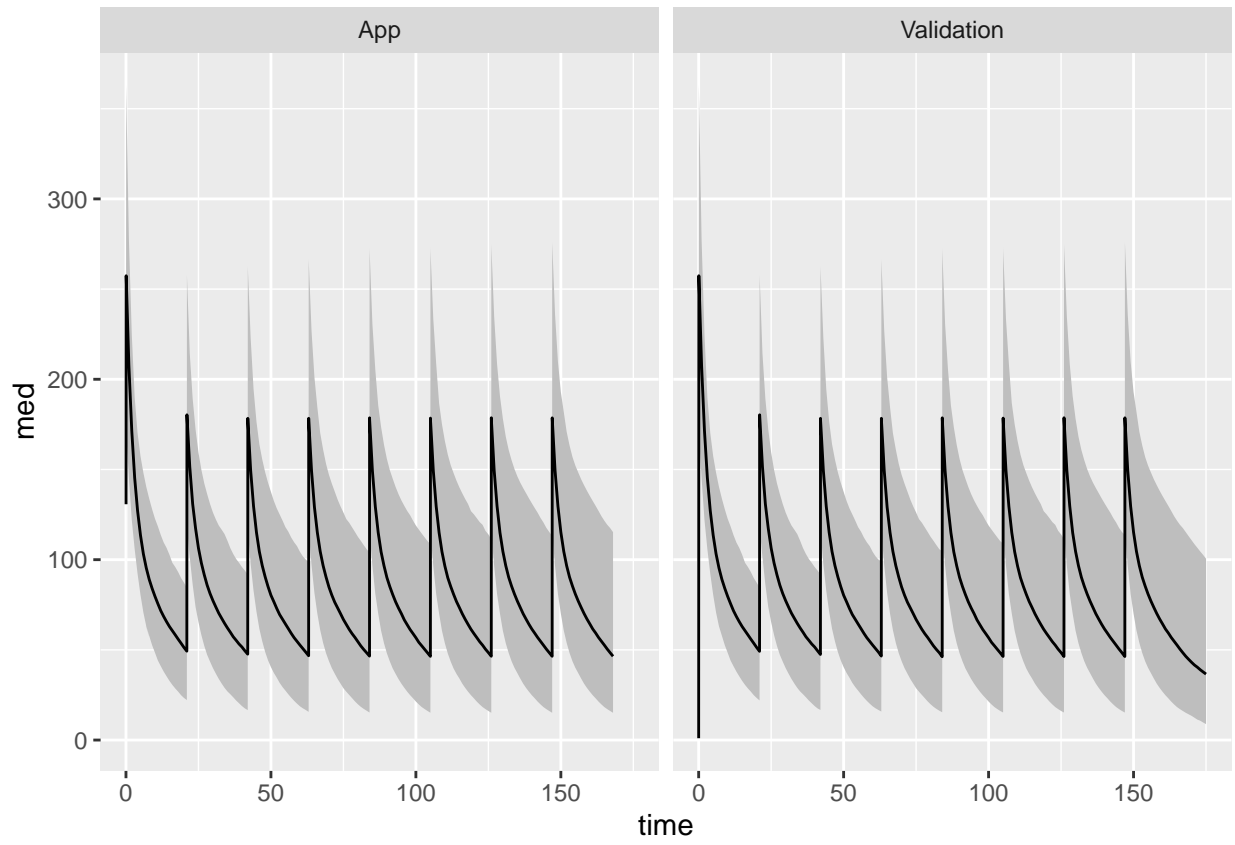

### 4.3 Case 3

```
plot.compare(case3.sim.dat, case3_simdata.app)
```

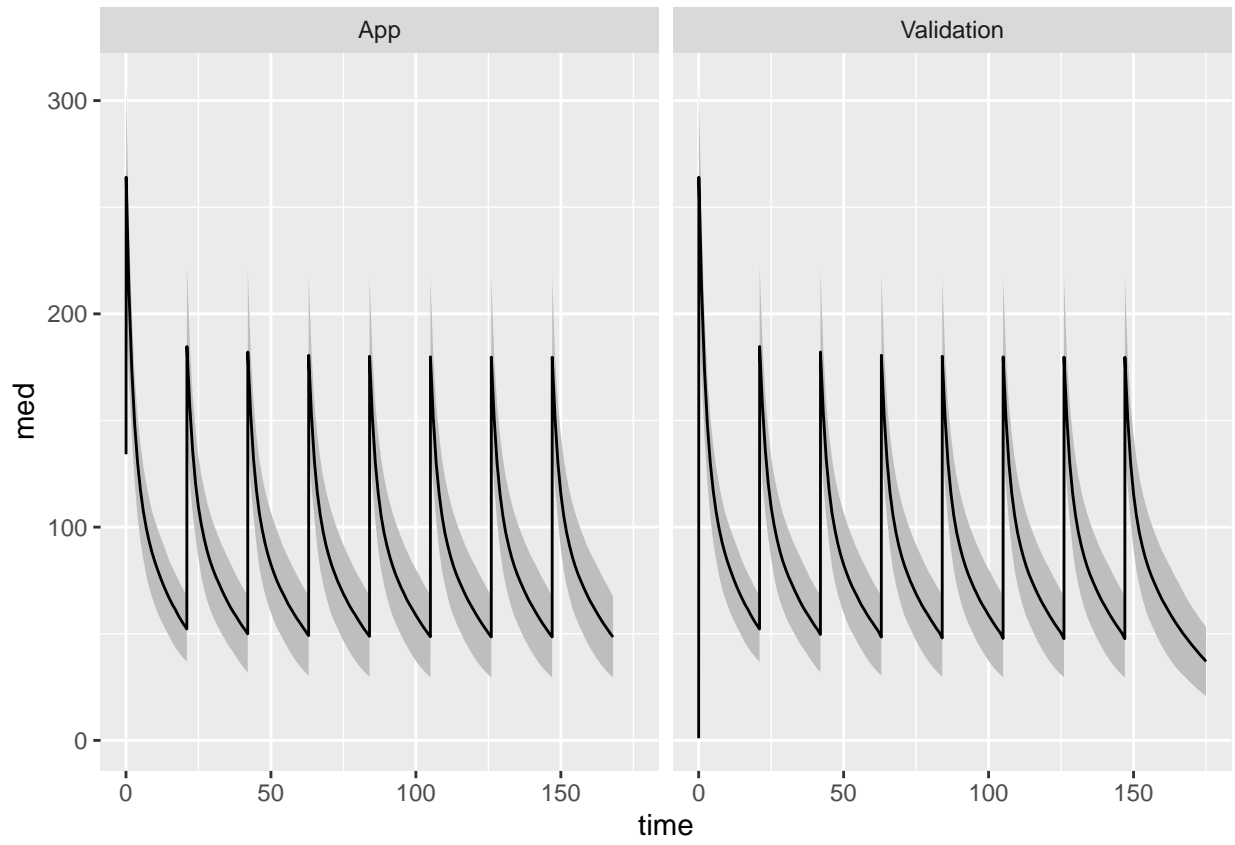

#### 4.4 Case 4

```
plot.compare(case4.sim.dat,case4_simdata.app)
```

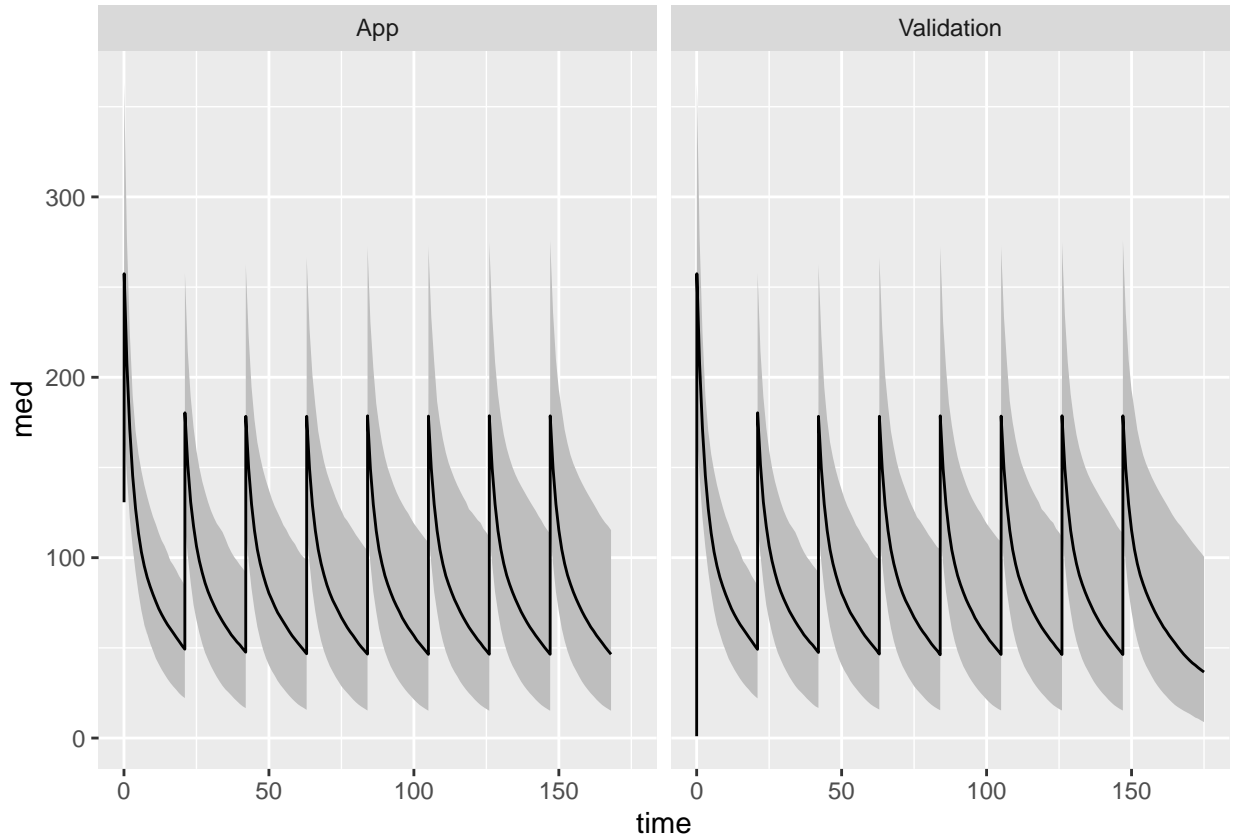

#### 4.4.1 By ALBU Bin

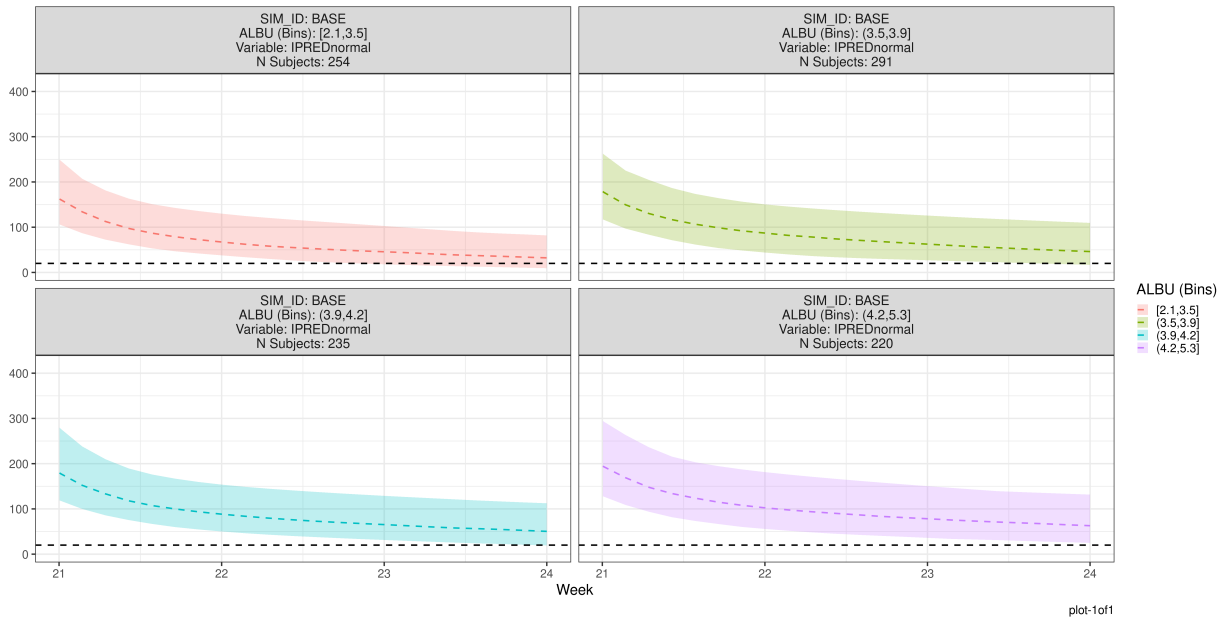

```
R.plot <- case4.sim.dat %>% filter(Cycle==8) %>%
  select(ID,time,IPREDnormal,ALBIN) %>%
```

```
group_by(time,ALBIN) %>%
dplyr::summarise(med=median(IPREDnormal),
                p5=quantile(IPREDnormal,p=0.05),
                p95=quantile(IPREDnormal,p=0.95)) %>%
mutate(type="Validation")
```

## 'summarise()' has grouped output by 'time'. You can override using the ## '.groups' argument.

```
ggplot(R.plot,aes(time))+
geom_ribbon(aes(ymin=p5,ymax=p95,fill=factor(ALBIN)),alpha=0.4)+
geom_line(aes(y=med)) +
facet_wrap("ALBIN")+ylim(c(0,400))+ scale_x_continuous(breaks=seq(21,24,by=1)*7,
                                                         labels=21:24)+
labs(x="Weeks")
```

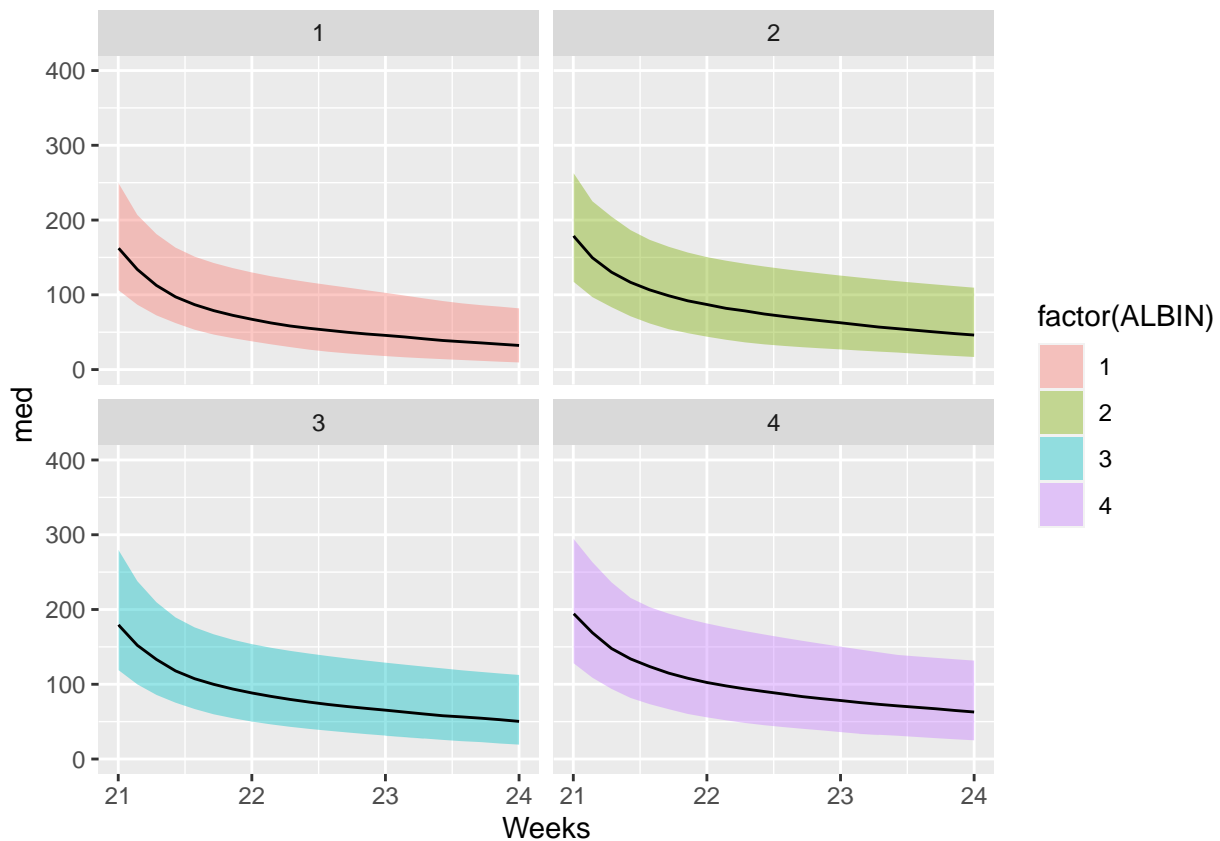

#### 4.5 Case 5

```
case5.plot<-case5.sim.dat %>%
filter(ID %in% 1:3) %>%
mutate(type="R") %>%
bind_rows(
```

```

case5_simdata.app %>%
  filter(ID %in% 1:3) %>%
  mutate(type="App")
)

ggplot(case5.plot,aes(time,IPREDnormal))+
  geom_line()+
  facet_grid(vars(ID),vars(type))

```

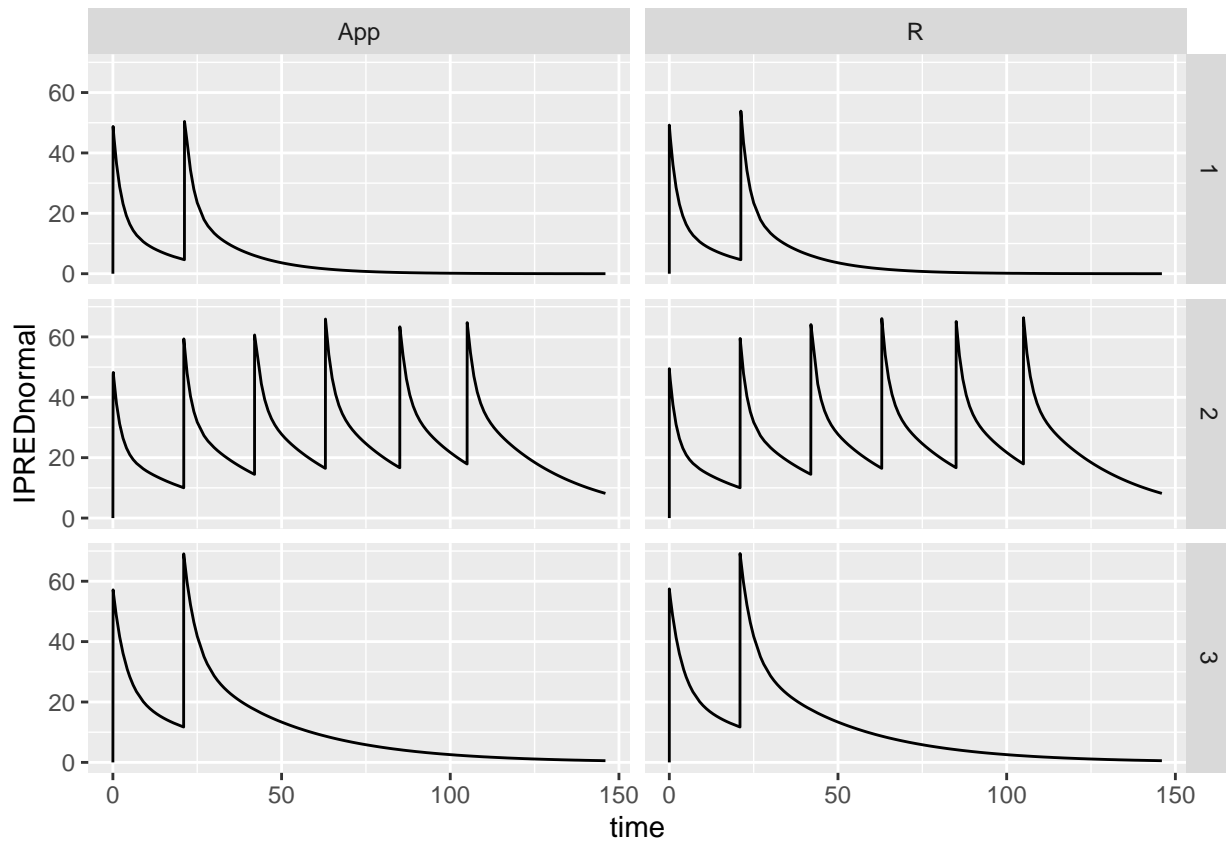

## 5 Summary Stats

- check AUC function in App

### 5.1 Function

```

# PKPDmisc::auc_partial(idv = time, dv = IPREDnormal)
# DescTools::AUC(time,IPREDnormal)
sumstats.func<-function(x,type=1){
  x %>%
  {if(type==1) group_by(.,ID,Cycle) else group_by(.,ID,Cycle,ALBIN)} %>%
  summarise(

```

```

    AUC=DescTools::AUC(time, IPREDnormal),
    LAST=min(IPREDnormal),
    MAX=max(IPREDnormal)
  ) %>% ungroup() %>%
  filter(!is.na(AUC)) %>%
  mutate(
    THRES=ifelse(LAST>20,1,0)
  ) %>%
  {if(type==1) group_by(.,Cycle) else group_by(.,Cycle,ALBIN)} %>%
  summarise(
    THRES=100*sum(THRES)/n(),
    across(
      c(AUC, LAST, MAX),
      .fns=list(CV=function(x){100*sd(x)/mean(x)},
                GM=function(x){exp(mean(log(x)))},
                GCV=function(x){sqrt(exp(sd(log(x))^2)-1)*100},
                Mean=mean,
                SD=sd,
                p50=median,
                p5=function(x){quantile(x,p=0.05)},
                p95=function(x){quantile(x,p=0.95)})
    )
  )
}

```

## 5.2 Case 1

### 5.2.1 Validation

```

case1.sum.stats.R<-case1.sim.dat %>%
  filter(Cycle<=8, IPRED>0) %>%
  sumstats.func()

```

## 'summarise()' has grouped output by 'ID'. You can override using the '.groups' ## argument.

### 5.2.2 Calculate % Difference

- With Same set of covariates, essentially same values

```

# Calculate Difference
abs_difference.case1 <- case1.app.stats %>%
  mutate(across(-Cycle,
    ~100-(100*abs(. - case1.sum.stats.R[[cur_column()]])/.),
    .names = "abs_diff_{.col}")) %>%
  select(Cycle, starts_with("abs"))
print(abs_difference.case1 %>%
  select(1,2:5))

```

## # A tibble: 8 x 5

```
## Cycle abs_diff_AUC_Mean abs_diff_AUC_SD abs_diff_AUC_p50 abs_diff_AUC_CV
## <int> <dbl> <dbl> <dbl> <dbl>
## 1 1 99.8 99.9 99.9 100.
## 2 2 99.9 100. 99.8 99.9
## 3 3 99.8 100. 99.8 99.9
## 4 4 100. 100. 100. 100.
## 5 5 99.8 100. 99.9 100.
## 6 6 99.9 100. 99.9 100.
## 7 7 99.8 100. 99.7 99.9
## 8 8 99.8 100. 99.8 99.9
```

```
print(abs_difference.case1 %>%
      select(1,6:9))
```

```
## # A tibble: 8 x 5
## Cycle abs_diff_AUC_p5 abs_diff_AUC_p95 abs_diff_AUC_GM abs_diff_AUC_GCV
## <int> <dbl> <dbl> <dbl> <dbl>
## 1 1 99.8 100. 99.8 99.8
## 2 2 100. 99.8 99.7 99.9
## 3 3 100. 99.9 99.9 99.9
## 4 4 100. 99.8 99.9 99.9
## 5 5 100. 100. 99.8 99.9
## 6 6 100. 99.9 99.8 100.
## 7 7 100. 100. 99.9 99.9
## 8 8 100. 99.9 99.8 99.9
```

```
print(abs_difference.case1 %>%
      select(1,10:13))
```

```
## # A tibble: 8 x 5
## Cycle abs_diff_LAST_Mean abs_diff_LAST_SD abs_diff_LAST_p50 abs_diff_LAST_CV
## <int> <dbl> <dbl> <dbl> <dbl>
## 1 1 100. 99.9 99.9 100.
## 2 2 100. 99.9 99.9 100.
## 3 3 100. 99.9 100. 99.9
## 4 4 100. 100. 100. 99.9
## 5 5 99.9 99.9 100. 99.9
## 6 6 99.9 99.9 99.9 100.
## 7 7 100. 100. 99.9 100.
## 8 8 100. 100. 100. 99.9
```

```
print(abs_difference.case1 %>%
      select(1,14:17))
```

```
## # A tibble: 8 x 5
## Cycle abs_diff_LAST_p5 abs_diff_LAST_p95 abs_diff_LAST_GM abs_diff_LAST_GCV
## <int> <dbl> <dbl> <dbl> <dbl>
## 1 1 99.8 100. 99.9 99.9
## 2 2 100. 100. 100. 99.9
## 3 3 99.9 99.6 99.9 99.9
## 4 4 100. 99.7 99.9 100.
## 5 5 99.7 99.7 100. 100.
```



```
## 6      6      99.7      99.7      99.9      100.
## 7      7      99.7      99.7      100.      100.
## 8      8      99.7      99.8      100.      100.
```

```
print(abs_difference.case1 %>%
      select(1,18:21))
```

```
## # A tibble: 8 x 5
##   Cycle abs_diff_MAX_Mean abs_diff_MAX_SD abs_diff_MAX_p50 abs_diff_MAX_CV
##   <int>      <dbl>      <dbl>      <dbl>      <dbl>
## 1     1          99.9          99.9          99.9          100.
## 2     2          99.8          99.9          99.8          99.9
## 3     3          99.8         100.          99.7          100.
## 4     4          99.8         100.          99.7          99.9
## 5     5          99.9          99.9          99.9          100.
## 6     6          99.9          99.9          99.8          99.9
## 7     7          99.8          99.9          99.9          99.9
## 8     8          99.9          99.9          99.9          99.9
```

```
print(abs_difference.case1 %>%
      select(1,22:25))
```

```
## # A tibble: 8 x 5
##   Cycle abs_diff_MAX_p5 abs_diff_MAX_p95 abs_diff_MAX_GM abs_diff_MAX_GCV
##   <int>      <dbl>      <dbl>      <dbl>      <dbl>
## 1     1          99.9          99.9         100.         100.
## 2     2          99.6          99.8          99.8          99.9
## 3     3          99.9          99.9          99.8          100.
## 4     4          99.7          99.9         100.          99.9
## 5     5          99.7          99.8          99.8          99.9
## 6     6          99.7          99.8          99.9          99.9
## 7     7          99.7         100.          99.7          99.8
## 8     8          99.7          99.8          99.9          100.
```

```
print(abs_difference.case1 %>%
      select(1,26))
```

```
## # A tibble: 8 x 2
##   Cycle abs_diff_THRES
##   <int>      <dbl>
## 1     1          100
## 2     2          100
## 3     3          100
## 4     4          100
## 5     5          100
## 6     6          100
## 7     7          100
## 8     8          100
```

## 5.3 Case 2

### 5.3.1 Validation data summary stats calculation

```
case2.sum.stats.R<-case2.sim.dat %>%  
  filter(Cycle<=8,IPRED>0) %>%  
  sumstats.func()
```

```
## 'summarise()' has grouped output by 'ID'. You can override using the '.groups'  
## argument.
```

### 5.3.2 Calculate Difference

```
# Calculate the absolute difference between the same variables in two datasets for sanity check  
abs_difference.case2 <- case2.app.stats %>%  
  mutate(across(-Cycle,  
    ~100-(100*abs(. - case2.sum.stats.R[[cur_column()]])/.),  
    .names = "abs_diff_{.col}")) %>%  
  select(Cycle,starts_with("abs"))  
print(abs_difference.case2 %>%  
  select(1,2:5))
```

```
## # A tibble: 8 x 5  
##   Cycle abs_diff_AUC_Mean abs_diff_AUC_SD abs_diff_AUC_p50 abs_diff_AUC_CV  
##   <int>          <dbl>          <dbl>          <dbl>          <dbl>  
## 1     1             99.8             100.           99.8           99.9  
## 2     2             99.8             99.9           99.9           99.9  
## 3     3             99.9             100.           99.8           100.  
## 4     4             99.8             100.           100.           99.9  
## 5     5             99.9             99.9           99.9           100.  
## 6     6             100.             99.9           100.           99.9  
## 7     7             99.9             100.           99.8           99.9  
## 8     8             99.7             100.           99.9           100.
```

```
print(abs_difference.case2 %>%  
  select(1,6:9))
```

```
## # A tibble: 8 x 5  
##   Cycle abs_diff_AUC_p5 abs_diff_AUC_p95 abs_diff_AUC_GM abs_diff_AUC_GCV  
##   <int>          <dbl>          <dbl>          <dbl>          <dbl>  
## 1     1             99.9             100.           99.8           99.8  
## 2     2             100.             99.9           99.7           99.9  
## 3     3             100.             100.           100.           100.  
## 4     4             100.             99.9           99.7           99.9  
## 5     5             100.             99.9           99.8           100.  
## 6     6             100.             99.9           100.           100.  
## 7     7             100.             99.9           99.7           99.9  
## 8     8             100.             99.9           99.9           99.9
```

```
print(abs_difference.case2 %>%
      select(1,10:13))
```

```
## # A tibble: 8 x 5
##   Cycle abs_diff_LAST_Mean abs_diff_LAST_SD abs_diff_LAST_p50 abs_diff_LAST_CV
##   <int>          <dbl>          <dbl>          <dbl>          <dbl>
## 1     1            99.9            99.8            99.9            99.9
## 2     2            99.9           100.            100.            100.
## 3     3           100.            100.            99.9            99.9
## 4     4           100.            99.9            99.9            99.9
## 5     5           100.            99.9           100.            99.9
## 6     6           100.            99.8            99.9            99.9
## 7     7            99.9           100.            99.9            100.
## 8     8           100.           100.            99.9            99.9
```

```
print(abs_difference.case2 %>%
      select(1,14:17))
```

```
## # A tibble: 8 x 5
##   Cycle abs_diff_LAST_p5 abs_diff_LAST_p95 abs_diff_LAST_GM abs_diff_LAST_GCV
##   <int>          <dbl>          <dbl>          <dbl>          <dbl>
## 1     1            99.9           100.            99.9            99.9
## 2     2            99.9           100.           100.            100.
## 3     3            99.9           100.           100.            99.9
## 4     4            99.7           100.            99.9            99.9
## 5     5            99.7            99.6           100.            100.
## 6     6            99.8            99.6           100.            99.9
## 7     7            99.8            99.8            99.9            100.
## 8     8            99.9            99.8            99.9            100.
```

```
print(abs_difference.case2 %>%
      select(1,18:21))
```

```
## # A tibble: 8 x 5
##   Cycle abs_diff_MAX_Mean abs_diff_MAX_SD abs_diff_MAX_p50 abs_diff_MAX_CV
##   <int>          <dbl>          <dbl>          <dbl>          <dbl>
## 1     1            99.9            99.9            99.8            100.
## 2     2            99.9           100.            99.8            99.8
## 3     3            99.9            99.9            99.8            99.9
## 4     4            99.7            99.9            99.8            99.9
## 5     5            99.9            99.9            99.8            99.9
## 6     6            99.9           100.            99.7            99.9
## 7     7            99.8           100.            99.8            100.
## 8     8            99.9            99.9            99.8            99.9
```

```
print(abs_difference.case2 %>%
      select(1,22:25))
```

```
## # A tibble: 8 x 5
##   Cycle abs_diff_MAX_p5 abs_diff_MAX_p95 abs_diff_MAX_GM abs_diff_MAX_GCV
##   <int>          <dbl>          <dbl>          <dbl>          <dbl>
```

```
## 1      1      99.8      100.      99.9      99.8
## 2      2      99.6      99.9      99.8      99.9
## 3      3      100.      99.9      99.8      99.8
## 4      4      99.7      99.9      99.8      100.
## 5      5      99.9      99.8      99.9      100.
## 6      6      99.8      99.9      99.9      99.9
## 7      7      99.8      100.      99.9      99.9
## 8      8      99.7      99.9      99.8      99.9
```

```
print(abs_difference.case2 %>%
      select(1,26))
```

```
## # A tibble: 8 x 2
##   Cycle abs_diff_THRES
##   <int>      <dbl>
## 1     1          100
## 2     2          100
## 3     3          100
## 4     4          100
## 5     5          100
## 6     6          100
## 7     7          100
## 8     8          100
```

## 5.4 Case 3

### 5.4.1 Validation data summary stats calculation

```
case3.sum.stats.R<-case3.sim.dat %>%
  filter(Cycle<=8,IPRED>0) %>%
  sumstats.func()
```

```
## 'summarise()' has grouped output by 'ID'. You can override using the '.groups'
## argument.
```

### 5.4.2 Calculate Difference

```
# Calculate the absolute difference between the same variables in two datasets for sanity check
abs_difference.case3 <- case3.app.stats %>%
  mutate(across(-Cycle,
                ~100-(100*abs(. - case3.sum.stats.R[[cur_column()]])/.),
                .names = "abs_diff_{.col}")) %>%
  select(Cycle,starts_with("abs"))

print(abs_difference.case3 %>%
      select(1,2:5))
```

```
## # A tibble: 8 x 5
##   Cycle abs_diff_AUC_Mean abs_diff_AUC_SD abs_diff_AUC_p50 abs_diff_AUC_CV
```

```
##   <int>          <dbl>          <dbl>          <dbl>          <dbl>
## 1     1           99.8           99.9           99.8           100.
## 2     2          100.           100.           99.8           99.7
## 3     3           99.8           99.9           99.7           99.8
## 4     4          100.           99.9           99.9           99.7
## 5     5           99.8           99.9           99.9           99.8
## 6     6          100.           100.           99.9           100.
## 7     7          100.           99.9           99.8           99.9
## 8     8          100.           99.9           99.7           99.8
```

```
print(abs_difference.case3 %>%
      select(1,6:9))
```

```
## # A tibble: 8 x 5
##   Cycle abs_diff_AUC_p5 abs_diff_AUC_p95 abs_diff_AUC_GM abs_diff_AUC_GCV
##   <int>          <dbl>          <dbl>          <dbl>          <dbl>
## 1     1           99.9           100.           99.9           99.9
## 2     2           99.6           99.8           99.8           99.8
## 3     3           99.9           100.           99.9           99.9
## 4     4           99.6           99.9           99.8           99.7
## 5     5           99.8           99.9           99.8           99.8
## 6     6           99.6           99.9           99.7           100.
## 7     7           99.7           100.           99.8           99.9
## 8     8           99.7           100.           99.8           99.9
```

```
print(abs_difference.case3 %>%
      select(1,10:13))
```

```
## # A tibble: 8 x 5
##   Cycle abs_diff_LAST_Mean abs_diff_LAST_SD abs_diff_LAST_p50 abs_diff_LAST_CV
##   <int>          <dbl>          <dbl>          <dbl>          <dbl>
## 1     1           99.9           100.           99.9           99.8
## 2     2           99.9           99.6           99.9           99.9
## 3     3          100.           99.6           100.           99.8
## 4     4           99.9           99.9           99.9           99.8
## 5     5          100.           99.6           99.9           99.8
## 6     6          100.           99.7           100.           99.9
## 7     7          100.           99.8           100.           99.8
## 8     8           99.9           99.8           100.           99.8
```

```
print(abs_difference.case3 %>%
      select(1,14:17))
```

```
## # A tibble: 8 x 5
##   Cycle abs_diff_LAST_p5 abs_diff_LAST_p95 abs_diff_LAST_GM abs_diff_LAST_GCV
##   <int>          <dbl>          <dbl>          <dbl>          <dbl>
## 1     1           99.9           100.           100.           99.8
## 2     2          100.           99.9           100.           99.8
## 3     3           99.9           100.           100.           99.8
## 4     4          100.           100.           99.9           99.9
## 5     5           99.9           99.9           99.9           99.9
## 6     6          100.           100.           99.9           100.
```

```
## 7      7      99.9      100.      99.9      99.9
## 8      8      99.8      100.      100.      99.9
```

```
print(abs_difference.case3 %>%
      select(1,18:21))
```

```
## # A tibble: 8 x 5
##   Cycle abs_diff_MAX_Mean abs_diff_MAX_SD abs_diff_MAX_p50 abs_diff_MAX_CV
##   <int>      <dbl>      <dbl>      <dbl>      <dbl>
## 1     1          99.9         100.         100.         99.8
## 2     2          99.8         99.8         99.8         99.8
## 3     3         100.         99.9         99.9         100.
## 4     4          99.9         99.9         99.8         99.7
## 5     5          99.8         99.9         99.9         99.6
## 6     6          99.9         99.8         99.9         99.7
## 7     7          99.9         99.9         99.8         99.7
## 8     8          99.9         99.9         99.8         99.7
```

```
print(abs_difference.case3 %>%
      select(1,22:25))
```

```
## # A tibble: 8 x 5
##   Cycle abs_diff_MAX_p5 abs_diff_MAX_p95 abs_diff_MAX_GM abs_diff_MAX_GCV
##   <int>      <dbl>      <dbl>      <dbl>      <dbl>
## 1     1         100.         99.9         100.         99.6
## 2     2          99.9         99.8         100.         99.6
## 3     3          99.8         99.9         99.8         99.9
## 4     4          99.9         99.9         99.8         99.7
## 5     5          99.8         99.9         99.9         99.9
## 6     6          99.7         99.9         99.8         100.
## 7     7          99.7         99.9         99.8         100.
## 8     8          99.7         100.         99.8         100.
```

```
print(abs_difference.case3 %>%
      select(1,26))
```

```
## # A tibble: 8 x 2
##   Cycle abs_diff_THRES
##   <int>      <dbl>
## 1     1             NA
## 2     2           100
## 3     3           100
## 4     4           100
## 5     5           100
## 6     6           100
## 7     7           100
## 8     8           100
```

## 5.5 Case 4

### 5.5.1 Validation data summary stats calculation

```
case4.sum.stats.R<-case4.sim.dat %>%
  filter(Cycle<=8,IPRED>0) %>%
  sumstats.func(type=2) %>%
  filter(Cycle==8) %>%
  select(-Cycle)
```

```
## 'summarise()' has grouped output by 'ID', 'Cycle'. You can override using the
## '.groups' argument.
## 'summarise()' has grouped output by 'Cycle'. You can override using the
## '.groups' argument.
## Adding missing grouping variables: 'Cycle'
```

### 5.5.2 Calculate Difference

```
# Calculate the absolute difference between the same variables in two datasets for sanity check
abs_difference.case4 <- case4.app.stats %>%
  mutate(across(-ALBIN,
    ~100-(100*abs(. - case4.sum.stats.R[[cur_column()]])/.),
    .names = "abs_diff_{.col}")) %>%
  select(ALBIN,starts_with("abs"))

print(abs_difference.case4 %>%
  select(1,2:5))
```

```
## # A tibble: 4 x 5
##   ALBIN abs_diff_AUC_Mean abs_diff_AUC_SD abs_diff_AUC_p50 abs_diff_AUC_CV
##   <int>          <dbl>          <dbl>          <dbl>          <dbl>
## 1     1             99.9             99.9             99.9             99.9
## 2     2             99.8             99.9             99.8             99.9
## 3     3             99.9            100.             100.             100.
## 4     4             99.8            100.             99.8             99.9
```

```
print(abs_difference.case4 %>%
  select(1,6:9))
```

```
## # A tibble: 4 x 5
##   ALBIN abs_diff_AUC_p5 abs_diff_AUC_p95 abs_diff_AUC_GM abs_diff_AUC_GCV
##   <int>          <dbl>          <dbl>          <dbl>          <dbl>
## 1     1            100.            100.            99.9            99.9
## 2     2            100.            100.            99.9            99.9
## 3     3            100.             99.9            99.8            100.
## 4     4            99.7            100.            99.9            99.9
```

```
print(abs_difference.case4 %>%
  select(1,10:13))
```

```
## # A tibble: 4 x 5
##   ALBIN abs_diff_LAST_Mean abs_diff_LAST_SD abs_diff_LAST_p50 abs_diff_LAST_CV
##   <int>         <dbl>         <dbl>         <dbl>         <dbl>
## 1     1           100.           99.8           99.9           99.9
## 2     2            99.9           100.           99.9           100.
## 3     3            99.9           99.9           99.9           99.9
## 4     4           100.           99.9           100.           99.9
```

```
print(abs_difference.case4 %>%
      select(1,14:17))
```

```
## # A tibble: 4 x 5
##   ALBIN abs_diff_LAST_p5 abs_diff_LAST_p95 abs_diff_LAST_GM abs_diff_LAST_GCV
##   <int>         <dbl>         <dbl>         <dbl>         <dbl>
## 1     1           100.           100.           100.           99.9
## 2     2            99.7           99.6           99.9           100.
## 3     3            99.8           99.6           99.9           99.9
## 4     4           100.           99.7           100.           100.
```

```
print(abs_difference.case4 %>%
      select(1,18:21))
```

```
## # A tibble: 4 x 5
##   ALBIN abs_diff_MAX_Mean abs_diff_MAX_SD abs_diff_MAX_p50 abs_diff_MAX_CV
##   <int>         <dbl>         <dbl>         <dbl>         <dbl>
## 1     1           100.           99.9           99.8           100.
## 2     2            99.9           99.9           99.9           99.9
## 3     3            99.7           100.           99.8           99.9
## 4     4            99.9           99.9           99.9           99.9
```

```
print(abs_difference.case4 %>%
      select(1,22:25))
```

```
## # A tibble: 4 x 5
##   ALBIN abs_diff_MAX_p5 abs_diff_MAX_p95 abs_diff_MAX_GM abs_diff_MAX_GCV
##   <int>         <dbl>         <dbl>         <dbl>         <dbl>
## 1     1            99.8           99.8           99.8           100.
## 2     2            99.8           99.8           99.8           99.9
## 3     3            99.8           99.9           99.9           99.9
## 4     4            99.9           100.           99.8           99.8
```

```
print(abs_difference.case4 %>%
      select(1,26))
```

```
## # A tibble: 4 x 2
##   ALBIN abs_diff_THRES
##   <int>         <dbl>
## 1     1           100.
## 2     2           100.
## 3     3           100.
## 4     4           100.
```
