# Supplementary material for: gPKPDviz: A flexible R shiny tool for pharmacokinetic/pharmacodynamic simulations using mrgsolve
Source: PubMed Central journal article supplement — CPT Pharmacometrics Syst Pharmacol. 2023 Dec 26;13(3):341–58. doi: 10.1002/psp4.13096 (PMC10941578; doi:10.1002/psp4.13096), 2023-12-26
Supplement: PSP4-13-341-s004.pdf [file PSP4-13-341-s004.pdf]

**Representative individuals from population.data.csv:**

| USUBJID | ALBU | LBW      | time |
|---------|------|----------|------|
| 4       | 2.8  | 62.08648 | 0    |
| 5       | 3.5  | 44.37677 | 0    |
| 6       | 3.4  | 74.73958 | 0    |
| 7       | 3.7  | 73.29    | 0    |
| 8       | 4.1  | 42.84821 | 0    |
| 9       | 3.7  | 52.83115 | 0    |
| 10      | 3.6  | 72.90127 | 0    |
| 11      | 3.5  | 42.60244 | 0    |
| 12      | 3.9  | 44.80087 | 0    |
| 13      | 3.2  | 49.46842 | 0    |
| 14      | 4    | 78.02738 | 0    |
| 15      | 3.2  | 55.72307 | 0    |
| 16      | 3.7  | 38.86106 | 0    |
| 17      | 4    | 47.29471 | 0    |
| 18      | 3.4  | 48       | 0    |
| 19      | 4.5  | 55.87193 | 0    |
| 20      | 3.3  | 43.52927 | 0    |
| 21      | 3.3  | 43.54046 | 0    |
| 22      | 4.4  | 69.62836 | 0    |
| 23      | 4    | 48.06001 | 0    |

**Representative individuals from population.data.indpara.csv:**

| USUBJID | time | CLind | V1ind | Qind | V2ind | ALBU | LBW      |
|---------|------|-------|-------|------|-------|------|----------|
| 4       | 0    | 0.45  | 3.21  | 0.53 | 2.68  | 2.8  | 62.08648 |
| 5       | 0    | 0.2   | 2.58  | 0.53 | 2.17  | 3.5  | 44.37677 |
| 6       | 0    | 0.34  | 4.89  | 0.53 | 4.05  | 3.4  | 74.73958 |
| 7       | 0    | 0.28  | 3.69  | 0.53 | 3.16  | 3.7  | 73.29    |

**Representative individuals from SamplingDosing.ind.csv:**

| USUBJID | time     | amt   | rate     | evid | cmt |
|---------|----------|-------|----------|------|-----|
| 4       | 0        | 158   | 2615.172 | 1    | 1   |
| 4       | 0.060417 |       |          | 0    | 0   |
| 4       | 0.128472 |       |          | 0    | 0   |
| 4       | 0.229167 |       |          | 0    | 0   |
| 4       | 0.322917 |       |          | 0    | 0   |
| 4       | 1.076389 |       |          | 0    | 0   |
| 4       | 3.975694 |       |          | 0    | 0   |
| 4       | 7.072917 |       |          | 0    | 0   |
| 4       | 14.20486 |       |          | 0    | 0   |
| 4       | 21.20069 |       |          | 0    | 0   |
| 4       | 21.20972 | 158   | 7584     | 1    | 1   |
| 4       | 21.22917 |       |          | 0    | 0   |
| 4       | 28.19444 |       |          | 0    | 0   |
| 4       | 41.96875 |       |          | 0    | 0   |
| 5       | 0        | 127.6 | 2041.6   | 1    | 1   |
| 5       | 0.060417 |       |          | 0    | 0   |
| 5       | 0.121528 |       |          | 0    | 0   |
| 5       | 0.215278 |       |          | 0    | 0   |
| 5       | 0.288194 |       |          | 0    | 0   |
| 5       | 1.069444 |       |          | 0    | 0   |
| 5       | 4.010417 |       |          | 0    | 0   |
| 5       | 7.017361 |       |          | 0    | 0   |
| 5       | 14.02778 |       |          | 0    | 0   |
| 5       | 20.98264 |       |          | 0    | 0   |
| 5       | 21       | 127.6 | 6124.8   | 1    | 1   |

|   |          |     |          |   |   |
|---|----------|-----|----------|---|---|
| 5 | 21.02083 |     |          | 0 | 0 |
| 5 | 28.21181 |     |          | 0 | 0 |
| 5 | 39.02778 |     |          | 0 | 0 |
| 5 | 41.94097 |     |          | 0 | 0 |
| 5 | 41.98403 | 128 | 6144     | 1 | 1 |
| 5 | 42.00347 |     |          | 0 | 0 |
| 5 | 49.01389 |     |          | 0 | 0 |
| 5 | 62.96875 |     |          | 0 | 0 |
| 5 | 62.98819 | 128 | 6144     | 1 | 1 |
| 5 | 63.00903 |     |          | 0 | 0 |
| 5 | 70.02083 |     |          | 0 | 0 |
| 5 | 80.96319 |     |          | 0 | 0 |
| 5 | 85.03819 | 125 | 6000     | 1 | 1 |
| 5 | 85.05833 |     |          | 0 | 0 |
| 5 | 91       |     |          | 0 | 0 |
| 5 | 104.9653 |     |          | 0 | 0 |
| 5 | 104.9965 | 125 | 5454.545 | 1 | 1 |
| 5 | 105.0188 |     |          | 0 | 0 |
| 5 | 111.9931 |     |          | 0 | 0 |
| 6 | 0        | 281 | 4496     | 1 | 1 |
| 6 | 0.063194 |     |          | 0 | 0 |
| 6 | 0.109722 |     |          | 0 | 0 |
| 6 | 0.260417 |     |          | 0 | 0 |
| 6 | 0.319444 |     |          | 0 | 0 |
| 6 | 0.979167 |     |          | 0 | 0 |
| 6 | 4.251389 |     |          | 0 | 0 |
| 6 | 6.989583 |     |          | 0 | 0 |

|   |          |     |       |   |   |
|---|----------|-----|-------|---|---|
| 6 | 13.98958 |     |       | 0 | 0 |
| 6 | 20.94444 |     |       | 0 | 0 |
| 6 | 20.96806 | 281 | 13488 | 1 | 1 |
| 6 | 20.98889 |     |       | 0 | 0 |
| 6 | 27.98611 |     |       | 0 | 0 |
| 6 | 34.98611 |     |       | 0 | 0 |
| 7 | 0        | 480 | 7680  | 1 | 1 |
| 7 | 0.063194 |     |       | 0 | 0 |
| 7 | 0.121528 |     |       | 0 | 0 |
| 7 | 0.21875  |     |       | 0 | 0 |
| 7 | 0.309028 |     |       | 0 | 0 |
| 7 | 1.09375  |     |       | 0 | 0 |
| 7 | 4.090278 |     |       | 0 | 0 |
| 7 | 7.225694 |     |       | 0 | 0 |

population.data.sensitivity.allpara.csv:

| USUBJID | PARA | RANK | time | TVCL    | TVV1   | TVQ    | TVV2  |
|---------|------|------|------|---------|--------|--------|-------|
| 1       | 1    | 1    | 0    | 0.05875 | 3.11   | 0.534  | 2.46  |
| 2       | 1    | 2    | 0    | 0.1175  | 3.11   | 0.534  | 2.46  |
| 3       | 1    | 3    | 0    | 0.235   | 3.11   | 0.534  | 2.46  |
| 4       | 1    | 4    | 0    | 0.47    | 3.11   | 0.534  | 2.46  |
| 5       | 1    | 5    | 0    | 0.94    | 3.11   | 0.534  | 2.46  |
| 6       | 2    | 1    | 0    | 0.235   | 0.7775 | 0.534  | 2.46  |
| 7       | 2    | 2    | 0    | 0.235   | 1.555  | 0.534  | 2.46  |
| 8       | 2    | 3    | 0    | 0.235   | 3.11   | 0.534  | 2.46  |
| 9       | 2    | 4    | 0    | 0.235   | 6.22   | 0.534  | 2.46  |
| 10      | 2    | 5    | 0    | 0.235   | 12.44  | 0.534  | 2.46  |
| 11      | 3    | 1    | 0    | 0.235   | 3.11   | 0.1335 | 2.46  |
| 12      | 3    | 2    | 0    | 0.235   | 3.11   | 0.267  | 2.46  |
| 13      | 3    | 3    | 0    | 0.235   | 3.11   | 0.534  | 2.46  |
| 14      | 3    | 4    | 0    | 0.235   | 3.11   | 1.068  | 2.46  |
| 15      | 3    | 5    | 0    | 0.235   | 3.11   | 2.136  | 2.46  |
| 16      | 4    | 1    | 0    | 0.235   | 3.11   | 0.534  | 0.615 |
| 17      | 4    | 2    | 0    | 0.235   | 3.11   | 0.534  | 1.23  |
| 18      | 4    | 3    | 0    | 0.235   | 3.11   | 0.534  | 2.46  |
| 19      | 4    | 4    | 0    | 0.235   | 3.11   | 0.534  | 4.92  |
| 20      | 4    | 5    | 0    | 0.235   | 3.11   | 0.534  | 9.84  |

**Dosing regimen for BASE case (Base.csv)**

| amt | evid | cmt | time | rate  |
|-----|------|-----|------|-------|
| 840 | 1    | 1   | 0    | 20000 |
| 420 | 1    | 1   | 21   | 20000 |
| 420 | 1    | 1   | 42   | 20000 |
| 420 | 1    | 1   | 63   | 20000 |
| 420 | 1    | 1   | 84   | 20000 |
| 420 | 1    | 1   | 105  | 20000 |
| 420 | 1    | 1   | 126  | 20000 |
| 420 | 1    | 1   | 147  | 20000 |

**Dosing regimen for delay-4-week case (delay-4-week.csv)**

| amt | evid | cmt | time | rate  |
|-----|------|-----|------|-------|
| 840 | 1    | 1   | 0    | 20000 |
| 420 | 1    | 1   | 21   | 20000 |
| 420 | 1    | 1   | 42   | 20000 |
| 420 | 1    | 1   | 70   | 20000 |
| 420 | 1    | 1   | 91   | 20000 |
| 420 | 1    | 1   | 112  | 20000 |
| 420 | 1    | 1   | 133  | 20000 |
| 420 | 1    | 1   | 154  | 20000 |

**Dosing regimen for delay-6-week case (delay-6-week.csv)**

| amt | evid | cmt | time | rate  |
|-----|------|-----|------|-------|
| 840 | 1    | 1   | 0    | 20000 |
| 420 | 1    | 1   | 21   | 20000 |
| 420 | 1    | 1   | 42   | 20000 |
| 840 | 1    | 1   | 84   | 20000 |
| 420 | 1    | 1   | 105  | 20000 |
| 420 | 1    | 1   | 126  | 20000 |
| 420 | 1    | 1   | 147  | 20000 |
| 420 | 1    | 1   | 168  | 20000 |

**Dosing regimen for delay-9-week case (delay-9-week.csv)**

| amt | evid | cmt | time | rate  |
|-----|------|-----|------|-------|
| 840 | 1    | 1   | 0    | 20000 |
| 420 | 1    | 1   | 21   | 20000 |
| 420 | 1    | 1   | 42   | 20000 |
| 840 | 1    | 1   | 105  | 20000 |
| 420 | 1    | 1   | 126  | 20000 |
| 420 | 1    | 1   | 147  | 20000 |
| 420 | 1    | 1   | 168  | 20000 |
| 420 | 1    | 1   | 189  | 20000 |

**Dosing regimen for alternative-q4-week case (alternative-q4-week.csv)**

| amt | evid | cmt | time | rate  |
|-----|------|-----|------|-------|
| 840 | 1    | 1   | 0    | 20000 |
| 420 | 1    | 1   | 28   | 20000 |
| 420 | 1    | 1   | 56   | 20000 |
| 420 | 1    | 1   | 84   | 20000 |
| 420 | 1    | 1   | 112  | 20000 |
| 420 | 1    | 1   | 140  | 20000 |
| 420 | 1    | 1   | 168  | 20000 |
| 420 | 1    | 1   | 196  | 20000 |

**Dosing regimen for alternative-q6-week case (alternative-q6-week.csv)**

| amt | evid | cmt | time | rate  |
|-----|------|-----|------|-------|
| 840 | 1    | 1   | 0    | 20000 |
| 840 | 1    | 1   | 42   | 20000 |
| 840 | 1    | 1   | 84   | 20000 |
| 840 | 1    | 1   | 126  | 20000 |
| 840 | 1    | 1   | 168  | 20000 |
| 840 | 1    | 1   | 210  | 20000 |
| 840 | 1    | 1   | 252  | 20000 |
| 840 | 1    | 1   | 294  | 20000 |
