# Supplementary material for: gPKPDviz: A flexible R shiny tool for pharmacokinetic/pharmacodynamic simulations using mrgsolve
Source: PubMed Central journal article supplement — CPT Pharmacometrics Syst Pharmacol. 2023 Dec 26;13(3):341–58. doi: 10.1002/psp4.13096 (PMC10941578; doi:10.1002/psp4.13096), 2023-12-26
Supplement: PSP4-13-341-s006.pdf [file PSP4-13-341-s006.pdf]

[PROB]

**Perjeta\_valid.cpp**

Perjeta population simulation

Source: run20d.lst

Time unit: day

Volume units: L

Validated: Yes

[PKMODEL] // option to use analytical solution for 1- and 2- cpt models

cmt = "CENT PERIPH", depot = FALSE

[PARAM] @annotated // list model parameters and covariates

TVCL : 0.235 : Clearance (L/day), theta 1

TVV1 : 3.11 : Volume of central compartment (L), theta 2

TVQ : 0.534 : Intercompartmental clearance (L/day), theta 3

TVV2 : 2.46 : Volume of peripheral compartment (L), theta 4

LBWCL : 0.516 : Effect of LBW on CL, theta 5

LBWV1 : 0.747 : Effect of LBW on V1, theta 6

ALBCL : -1.06 : Effect of ALBU on CL, theta 7

LBWV2 : 0.83 : Effect of LBW on V2, theta 8

LBW : 48 : Typical individual value of LBW

ALBU : 3.9 : Typical individual value of ALBU

[OMEGA] @annotated @block // describe between-subject variability

ETA\_CL : 0.116 : ETA on CL

ETA\_V1 : 0.0239 0.0342 : ETA on V1

ETA\_V2 : -0.0416 0.0179 0.211 : ETA on V2

[SIGMA] @annotated // describe residual error

ADD : 0.0328 : Additive Error (log scale)

```

[MAIN] // NONMEM equivalent: $PK

// effect of covariates on parameters
double CLCOV = pow((LBW/48), LBWCL) * pow((ALBU/3.9), ALBCL);
double V1COV = pow((LBW/48), LBWV1);
double V2COV = pow((LBW/48), LBWV2);

// PK parameters
double CL  = TVCL * CLCOV * exp(ETA_CL);
double V1  = TVV1 * V1COV * exp(ETA_V1);
double Q   = TVQ;
double V2  = TVV2 * V2COV * exp(ETA_V2);

[TABLE] // NONMEM equivalent: $ERROR
double val = CENT/V1;
double IPRED = 0;
double IPREDnormal = 0;

if (val > 0) IPRED = log(val);
if (val > 0) IPREDnormal = exp(IPRED);

double DV = IPRED + ADD;
double DVnormal = exp(DV);

[CAPTURE] @annotated
IPREDnormal : Concentration without residual variability (normal scale)
DVnormal    : Concentration with residual variability (normal scale)
IPRED       : Concentration without residual variability (log scale)
DV          : Concentration with residual variability (log scale)

```

[PROB]

**Perjeta.ind.cpp**

Perjeta individual simulation

Source: Perjeta\_valid.cpp

Time unit: day

Volume units: L

[PKMODEL] // option to use analytical solution for 1- and 2- cpt models

cmt = "CENT PERIPH", depot = FALSE

[PARAM] @annotated // list model parameters and covariates

CLind : 0.235 : Clearance (L/day), theta 1

V1ind : 3.11 : Volume of central compartment (L), theta 2

Qind : 0.534 : Intercompartmental clearance (L/day), theta 3

V2ind : 2.46 : Volume of peripheral compartment (L), theta 4

//[OMEGA] @annotated @block // describe between-subject variability

[SIGMA] @annotated // describe residual error

ADD : 0.0328 : Additive Error (log scale)

[MAIN] // NONMEM equivalent: \$PK

// PK parameters

double CL = CLind;

double V1 = V1ind;

double Q = Qind;

double V2 = V2ind;

[TABLE] // NONMEM equivalent: \$ERROR

double val = CENT/V1;

```
double IPRED = 0;
```

```
double IPREDnormal = 0;
```

```
if (val > 0) IPRED = log(val);
```

```
if (val > 0) IPREDnormal = exp(IPRED);
```

```
double DV = IPRED + ADD;
```

```
double DVnormal = exp(DV);
```

[CAPTURE] @annotated

IPREDnormal : Concentration without residual variability (normal scale)

DVnormal : Concentration with residual variability (normal scale)

IPRED : Concentration without residual variability (log scale)

DV : Concentration with residual variability (log scale)

[PROB]

**Perjeta.sensitivity.cpp**

Perjeta sensitivity analysis

Source: Perjeta\_valid.cpp

Time unit: day

Volume units: L

[PKMODEL] // option to use analytical solution for 1- and 2- cpt models

cmt = "CENT PERIPH", depot = FALSE

[PARAM] @annotated // list model parameters and covariates

TVCL : 0.235 : Clearance (L/day), theta 1

TVV1 : 3.11 : Volume of central compartment (L), theta 2

TVQ : 0.534 : Intercompartmental clearance (L/day), theta 3

TVV2 : 2.46 : Volume of peripheral compartment (L), theta 4

PARA : 1 : 1 for TVCL, 2 for TVV1, 3 for TVQ, 4 for TVV2

RANK : 1 : rank the parameter values (1 is lowest)

LBWCL : 0.516 : Effect of LBW on CL, theta 5

LBWV1 : 0.747 : Effect of LBW on V1, theta 6

ALBCL : -1.06 : Effect of ALBU on CL, theta 7

LBWV2 : 0.83 : Effect of LBW on V2, theta 8

LBW : 48 : Typical individual value of LBW

ALBU : 3.9 : Typical individual value of ALBU

[OMEGA] @annotated @block // describe between-subject variability

ETA\_CL : 0.116 : ETA on CL

ETA\_V1 : 0.0239 0.0342 : ETA on V1

ETA\_V2 : -0.0416 0.0179 0.211 : ETA on V2

```
[SIGMA] @annotated // describe residual error
```

```
ADD : 0.0328 : Additive Error (log scale)
```

```
[MAIN] // NONMEM equivalent: $PK
```

```
// effect of covariates on parameters
```

```
double CLCOV = pow((LBW/48), LBWCL) * pow((ALBU/3.9), ALBCL);
```

```
double V1COV = pow((LBW/48), LBWV1);
```

```
double V2COV = pow((LBW/48), LBWV2);
```

```
// PK parameters
```

```
double CL = TVCL * CLCOV * exp(ETA_CL);
```

```
double V1 = TVV1 * V1COV * exp(ETA_V1);
```

```
double Q = TVQ;
```

```
double V2 = TVV2 * V2COV * exp(ETA_V2);
```

```
[TABLE] // NONMEM equivalent: $ERROR
```

```
double val = CENT/V1;
```

```
double IPRED = 0;
```

```
double IPREDnormal = 0;
```

```
if (val > 0) IPRED = log(val);
```

```
if (val > 0) IPREDnormal = exp(IPRED);
```

```
double DV = IPRED + ADD;
```

```
double DVnormal = exp(DV);
```

```
[CAPTURE] @annotated
```

```
IPREDnormal : Concentration without residual variability (normal scale)
```

```
DVnormal : Concentration with residual variability (normal scale)
```

```
IPRED : Concentration without residual variability (log scale)
```

```
DV : Concentration with residual variability (log scale)
```

[PROB]

**Pola.ind.cpp**

Pola individual simulation

Source: PKcase\_Polatuzumab.valid.cpp (provided in the model library)

Time unit: hr

Volume units: L

[CMT] @annotated

CENT : central compartment for acMMAE

PERI : peripheral compartment for acMMAE

CMMAE : central compartment for MMAE

CMMAE2: peripheral compartment for MMAE

[PARAM] @annotated

covBBCC:19: Baseline B cell count  $10^6/L$  (median)

covCOMBO:1:

covSEXN:1:

covRRFN:1:

covRACEN:1: 0 Not Asian, 1 Asian

covBHPTGRPN: 1: Baseline Hepatic Function Group 1 'Normal'; 2 'MILD1'; 3 'MILD2'; 4 'MODERATE'; 5 'SEVERE'; 9999 'missing'.

covBECOG:1: Baseline ECOG

covBTMBD:3031: Baseline tumor size

covBALBUM:39: Baseline Albumin

covBWT:77.9: Baseline Weight

PKETA1 : 0.1: random effect 1

PKETA2 : 0.1: random effect 2

PKETA3 : 0.1: random effect 3

PKETA4 : 0.1: random effect 4

PKETA5 : 0.1: random effect 5

PKETA6 : 0.1: random effect 6

PKETA7: 0.1: random effect 7  
PKETA8 :0.1: random effect 8  
PKETA9 : 0.1: random effect 9  
PKETA10 : 0.1: random effect 10  
PKETA11 :0.1: random effect 11

TVKDES :0.0046: 1~KDES  
TVCLT:0.0062 : 2~CLT  
TVCLINF:0.0344 : 3~CLINF  
TVV1:3.14 : 4~V1  
TVV2: 3.96: 5~V2  
TVQ:0.014 : 6~Q  
TVVMAX:0.0204 : 7~VMAX  
TVKM:0.604 : 8~KM  
TVCLIMAX: 0.223: 9~CLinf decrease EMAX  
T50\_Mon :3.51:10~CLinf T50 (month)  
TVGAM :2.27 :11~CLing GAM

TVVMMAE: 83.3 :12~VMMAE  
TVCLMMAE :1.91:13~CLMMAE  
TVQMMAE :36.5:14~QMMAE  
TVV2MMAE: 202 :15~V2MMAE  
TVVMAXMM :0.0305:16~VMAXMMAE  
TVKSS :0.584:17~KSS  
TVFRAC1 :3.71:18~FRAC1  
TVFRAC2 :2.70:19~FRAC2  
ALPH\_H :0.167:20~alpha  
TVFREMAX: 0.138:21~FREMAX

WTCLF: 0.735:22~WT to CLinf  
WTVQ: 0.501 :23~WT to V1 V2 Q  
SEXV1: 1.2:24~SEX on V1



ASIV1: 0.93 :25~ASIAN on V1  
NAIVV1: 1.2 :26~NAIVE on V1  
SEXCLINF: 1.1:27~SEX on CLinf  
ALBCLINF:-0.247 :28~ALBUM to CLinf  
RTXCLINF: 0.843:29~RTX GA101 to CLinf  
BCECLINF:0.0210 :30~power BCEL1 to CLinf  
TMBCLINF: 0.052 :31~TMBD to CLinf  
NAIVKDES: 3.36:32~NAIVE to KDES  
RTXKDES:0.936 :33~RTX GA101 to KDES  
NAIVECLT: 3.53:34~NAIVE to CLT  
BTMBCLT:1152 :35~BTMBD50 to CLT  
BBCC\_CUT:120:36~BBCC cutoff  
BCELCLT: 0.589:37~BCEL to CLT power

BWTFRAC0:-0.468 :38~BWT to FRAC0  
SEXFRAC0: 0.918:39~SEX to FRAC0  
NAIFRAC0:0.760 :40~NAIVE to FRAC0  
RTXFRAC0:0.714 :41~RTX/OB to FRAC0  
HEPFRAC0:1.18 :42~HEPA to FRAC0  
ECOFRAC0: 0.904:43~ECOG0 to FRAC0  
ALBFRAC0: -0.613:44~ALBUM to FRAC0

[OMEGA]

EERR1: 0.052 :10~IIV\_ERR1  
EERR2: 0.038 0.043 :11~IIV\_ERR2

[SIGMA] @annotated

PROP1: 0.0254 : ~Err\_PROP  
PROP2: 0.0726 : ~Err\_PROP

[MAIN]

double BCEL = 1;

```

if (covBBCC > BBCC_CUT) BCEL=covBBCC/BBCC_CUT;
double BCEL1 = 1;
if (covBBCC > 1) BCEL1=covBBCC;

double RTX = 0;
if (covCOMBO==1) RTX = 1;
double GA101 = 0;
if (covCOMBO==2) GA101 = 1;

double SEX = covSEXN-1;

double NAIVE = 0;
if (covRRFN==0) NAIVE=1;

double ASIAN = 0;
if (covRACEN==1) ASIAN = 1;

double HEPA = 0;
if ((covBHPTGRPN>1.5) & (covBHPTGRPN!=9999)) HEPA = 1;

double ECOG0 = 0;
if (covBECOG==0) ECOG0 = 1;
double ECOG2 = 0;
if (covBECOG==2) ECOG2 = 1;

double COVV1 = pow(SEXV1,SEX)*pow(ASIV1,ASIAN)*pow(NAIVV1,NAIVE);
double COVCLINF =
pow(SEXCLINF,SEX)*pow((covBALBUM/35),ALBCLINF)*pow(RTXCLINF,(RTX+GA101))*pow(BCEL1,BCECLINF)*(1+TMBCLINF*(covBTMBD/5000-1));
double COVKDES = pow(NAIVKDES,NAIVE)*pow(RTXKDES,(RTX+GA101));
double COVCLT = pow(NAIVECLT,NAIVE)*covBTMBD/(BTMBCLT+covBTMBD)*pow(BCEL,BCELCLT);

double KDES = TVKDES*COVKDES;

```

```

double CLT = TVCLT*COVCLT*exp(PKETA1) ;
double CLINF = TVCLINF*pow((covBWT/75),WTCLF)*COVCLINF*exp(PKETA2);
double V1 = TVV1*pow((covBWT/75),WTVQ)*COVV1*exp(PKETA3);
double V2 = TVV2*pow((covBWT/75),WTVQ)*exp(PKETA4);
double Q = TVQ*pow((covBWT/75),WTVQ)*exp(PKETA5);
double VMAX = TVVMAX*exp(PKETA6);
double KM = TVKM;
double CLINFEMAX= TVCLIMAX;
double T50 = T50_Mon*24*30;
double GAM = TVGAM;
double T50GAM = pow(T50,GAM);

//double S1 = V1;
double K12 = Q/V1;
double K21 = Q/V2;

double COVMMAE1= pow((covBWT/75),
BWTFRAC0)*pow(SEXFRAC0,SEX)*pow(NAIFRAC0,NAIVE)*pow(RTXFRAC0,(RTX+GA101))*pow(HEPFRAC0,HEPA);
double COVMMAE = COVMMAE1*pow(ECOFRAC0,ECOG0)*pow((covBALBUM/35),ALBFRAC0) ;

double FRAC0 = COVMMAE*exp(PKETA7) ;
double VMMAE = TVVMMAE ;
double CLMMAE = TVCLMMAE*exp(PKETA8);
double QMMAE = TVQMMAE;
double V2MMAE = TVV2MMAE*exp(PKETA9);
double VMAXMMAE = TVVMAXMM ;
double KSS = TVKSS;
double FRAC1 = TVFRAC1 ;
double FRAC2 = TVFRAC2 ;
double ALPH = ALPH_H/24/30;
double FREMAX = TVFREMAX;
double K34 = QMMAE/VMMAE;
double K43 = QMMAE/V2MMAE;

```

```
double K30 = CLMMAE/VMMAE;
```

```
[ODE]
```

```
double FRAC = FRAC0*(1+FREMAX*exp(-ALPH*SOLVERTIME));
```

```
double TGAM = 0;
```

```
if (SOLVERTIME > 0) TGAM = pow(SOLVERTIME,GAM);
```

```
double CL=CLT*exp(-KDES*SOLVERTIME)+CLINF*(1+CLINFEMAX*T50GAM/(T50GAM+TGAM));
```

```
double K10 = CL/V1;
```

```
double KINPUT = FRAC*(FRAC1*CLT*exp(-KDES*SOLVERTIME)/V1+CLINF*(1+CLINFEMAX*T50GAM/(T50GAM+TGAM))/V1+FRAC2*VMAX/(KM+CENT/V1));
```

```
dxdt_CENT= K21*PERI-K12*CENT-K10*CENT-VMAX*CENT/(KM+CENT/V1);
```

```
dxdt_PERI=-K21*PERI+K12*CENT;
```

```
dxdt_CMMAE= KINPUT*CENT-K30*CMMAE - K34*CMMAE + K43*CMMAE2 - VMAXMMAE*CMMAE/(KSS+CMMAE/VMMAE);
```

```
dxdt_CMMAE2=K34*CMMAE - K43*CMMAE2;
```

```
[TABLE]
```

```
double ACMMAE = CENT/V1;
```

```
double MMAE = CMMAE/VMMAE;
```

```
double TY=ACMMAE; // Ab Conjugated
```

```
double TY6=MMAE; // For Type==6, MMAE
```

```
double DV_acMMAE=TY*(1+PROP1*exp(PKETA10));
```

```
double DV_MMAE=TY6*(1+PROP2*exp(PKETA11)) ; // For Type==6
```

```
[CAPTURE] @annotated
```

```
ACMMAE: Concentration without residual variability for acMMAE
```

```
MMAE: Concentration without residual variability for MMAE
```

```
DV_acMMAE: Concentration with residual variability for acMMAE
```

```
DV_MMAE : Concentration with residual variability for MMAE
```
